# Supplementary material for: Prevalence of and related risk factors in oral mucosa diseases among residents in the Baoshan District of Shanghai, China
Source: PeerJ. 2020 Feb 24;8:e8644. doi: 10.7717/peerj.8644 (PMC7045885; doi:10.7717/peerj.8644)
Supplement: Supplemental Information 1 [file peerj-08-8644-s001.xlsx]

## Sheet: 汇总
Summary of the epidemiological investigation of oral mucous membrane disease in baoshan district residents
Family number	Questionnaire number	gender	age(years)	Follow-up 4 years later	Inspection time	Oral symptoms 2014	Oral symptoms 2018	lesion location 2014	lesion location 2018	Clinical diagnosis 2014	Clinical diagnosis 2018	A1	A2	A3	A4	A5	A6	B1	B2	B3	B4	B5	C1	C2	D1	D2	D3	E1	E2	E3	E4	F1	F2	F3	F4	F5	F6
1	1-A	female	81		2014.7.1/2018.10.11	0	0	0	0	0	0	1	Baoshan in Shanghai	81	2	2	11	3					2		1,3	1	1	1	2	1	1	1	1	2	2	2	1
1	1-B	male	80		2014.7.1/2018.10.11	0	0	0	0	0	0	1	Baoshan in Shanghai	80	5	2	11	2					1	10	1,3	1	1	1	2	6	1	1	1	2	4	2	1
2	2-A	female	77		2014.7.1/2018.10.11	0	0	0	0	0	0	1	Baoshan in Shanghai	60	3	2	5	3					2		1	2	1	1	1	6	2	1	1	1	2	4	1
2	2-B	male	75		2014.7.1/2018.10.11	0	0	0	0	0	0	1	Baoshan in Shanghai	75	4	2	11	3					1	40	1,2	1	1	1	2	1	2,3	1	1	2	3	4	1
3	3-A	female	69		2014.7.1/2018.10.11	0	0	0	0	0	0	1	Baoshan in Shanghai	69	2	2	11	3					2		2	3	2	1	1	1	1	1	1	2	2	1	1
3	3-B	male	70		2014.7.1/2018.10.11	0	0	0	0	0	0	1	Baoshan in Shanghai	70	3	2	11	1	30	40	7	20	1	30	1	3	2	2	2	1	1	1	1	2	1	2	1
4	4-A	female	85		2014.7.1/2018.10.11	1	0	9	0	9	0	1	Baoshan in Shanghai	65	1	2	11	3					2		1	1	1	1	1	2	1	3	1	1	2	4	1
4	4-B	male	84		2014.7.1/2018.10.11	0	0	0	0	0	0	1	Baoshan in Shanghai	84	2	2	11	3					3		2	1	1	1	2	3	1	1	1	2	1	1	1
5	5-A	female	79		2014.7.1/2018.10.11	0	0	0	0	0	0	1	Baoshan in Shanghai	79	1	2	11	3					1	15	2,3	1	1	1	2	1	1	1	1	1	4	3	1
5	5-B	male	79		2014.7.1/2018.10.11	0	0	0	0	0	0	1	Baoshan in Shanghai	79	3	2	11	1	49	30	7	6	1	40	1	1	1	1	2	5	1	1	1	1	4	4	2
6	6-A	female	77		2014.7.1/2018.10.11	0	0	0	0	0	0	1	Baoshan in Shanghai	77	1	5	11	3					3		1	1	1	1	2	1	2	3	1	1	2	2	1
7	7-A	female	63	Lost to follow-up	2014.7.1/2018.10.11	0	0	0	0	0	0	1	Baoshan in Shanghai	63	3	2	11	3					1	40	1,2,3,4	1	1	1	2	1	2	1	1	2	4	3	1
8	8-A	female	55		2014.7.1/2018.10.11	0	0	0	0	0	0	1	Baoshan in Shanghai	55	3	2	11	3					2		1	1	1	1	2	1	1	1	1	1	2	4	1
9	9-A	female	61		2014.7.1/2018.10.11	0	0	0	0	0	0	1	Baoshan in Shanghai	61	2	2	11	3					2		1	3	1	1	1	1	2,5	3	1	2	4	3	1
10	10-A	female	62		2014.7.1/2018.10.11	0	0	0	0	0	0	1	Baoshan in Shanghai	62	3	2	11	3					2		1	1	1	2	2	1	1	1	1	1	4	4	1
11	11-A	female	69		2014.7.1/2018.10.11	0	0	0	0	0	0	1	Baoshan in Shanghai	69	2	2	11	3					2		1	3	1	1	1	6	2,5	3	1	1	3	2	1
12	12-A	female	70		2014.7.1/2018.10.11	0	0	0	0	0	0	1	Baoshan in Shanghai	70	1	2	11	3					2		1	1	1	2	2	1	1	1	1	1	4	2	1
12	12-B	male	69		2014.7.1/2018.10.11	0	0	0	0	0	0	1	Baoshan in Shanghai	69	3	2	11	1	39	30	7	9	1	30	1,2，3,4	3	1	1	2	1	1	1	1	2	1	2	1
13	13-A	male	59		2014.7.1/2018.10.11	0	0	0	0	0	0	1	Baoshan in Shanghai	59	3	2	11	1	19	40	7	20	1	40	1	2	1	1	2	1	1	1	1	2	3	4	1
13	13-B	female	57		2014.7.1/2018.10.11	0	0	0	0	0	0	1	Baoshan in Shanghai	57	4	2	11	3					2		1,2,3,4	2	1	1	2	1	2	1	1	2	3	4	1
14	14-A	male	82		2014.7.1/2018.10.11	0	1	0	6	0	9	1	Baoshan in Shanghai	82	2	2	11	3					2		1	3	1	1	2	1	1	1	1	1	2	4	1
14	14-B	female	80		2014.7.1/2018.10.11	0	0	0	0	0	0	1	Baoshan in Shanghai	80	1	2	11	3					2		1	3	1	1	2\1	6	1\5	2\1	1	1	2	4	1
15	15-A	female	67		2014.7.1/2018.10.11	0	0	0	0	0	0	1	Baoshan in Shanghai	67	3	2	11	3					2		1,2	1	1	2	2	1	2	1	1	1	3	2	1
15	15-B	male	63		2014.7.1/2018.10.11	0	0	0	0	0	0	1	Baoshan in Shanghai	63	3	2	11	3					1	30	5	3	1	2	2	1	1	1	1	2	3	4	1
16	16-A	male	65		2014.7.1/2018.10.11	0	0	0	0	0	0	1	Baoshan in Shanghai	65	2	2	11	3					1	30	1	3	1	2	2	1	1	1	1	1	2	4	1
16	16-B	female	61		2014.7.1/2018.10.11	0	0	0	0	0	0	1	Baoshan in Shanghai	61	1	2	11	3					2		1	1	1	2	2	1	1	1	1	1	2	4	1
17	17-A	female	72	Lost to follow-up	2014.7.1/2018.10.11	0	0	0	0	0	0	1	Baoshan in Shanghai	30	4	2	11	3					2		3	1	1	1	2	1	1	1	1	1	2	2	1
18	18-A	female	57		2014.7.1/2018.10.11	0	0	0	0	0	0	1	Baoshan in Shanghai	57	4	2	11	3					2		1	1	1	1	2	1	1	1	1	2	4	2	1
19	19-A	male	71		2014.7.1/2018.10.11	0	0	0	0	0	0	1	Baoshan in Shanghai	71	2	2	11	3					2		1	2	1	1	2	1	1	1	1	1	2	4	1
20	20-A	male	62		2014.7.1/2018.10.11	1	0	4	0	9	0	1	Baoshan in Shanghai	62	2	2	11	2					1	40	1,3	2	1	2	2	1	1	1	1	1	3	4	1
21	21-A	female	81		2014.7.1/2018.10.11	0	0	0	0	0	0	1	Baoshan in Shanghai	81	3	2	11	3					2		1	1	1	1	2	1	1	1	1	1	2	4	1
22	22-A	female	65		2014.7.1/2018.10.11	0	0	0	0	0	0	1	Baoshan in Shanghai	65	2	2	11	3					2		1	2	1	2	2	1	1	1	1	1	4	3	1
23	23-A	female	52		2014.7.1/2018.10.11	0	0	0	0	0	0	1	Baoshan in Shanghai	52	4	3	11	3					2		1	1	1	2	2	1	1	1	1	1	3	3	1
24	24-A	female	62		2014.7.1/2018.10.11	1	0	5	0	9	0	1	Baoshan in Shanghai	62	1	2	11	3					2		1	2	1	2	2	1	1	1	1	1	1	3	1
25	25-A	female	65		2014.7.1/2018.10.11	0	0	0	0	0	0	1	Baoshan in Shanghai	65	1	2	11	3					2		1	1	1	1	2	2	1	1	1	1	2	3	1
25	25-B	male	66		2014.7.1/2018.10.11	0	0	0	0	0	0	1	Baoshan in Shanghai	66	2	2	11	1	20	46	7	20	2		1	2	2	2	2	1	1	1	1	1	2	2	1
26	26-A	female	67		2014.7.1/2018.10.11	0	0	0	0	0	0	1	Baoshan in Shanghai	67	3	2	11	3					2		1	1	1	2	2	1	1	1	1	2	4	3	2
26	26-B	male	70		2014.7.1/2018.10.11	0	0	0	0	0	0	1	Baoshan in Shanghai	70	3	2	11	3					2		1	1	1	1	2	2	2	1	1	1	4	3	2
27	27-A	female	59		2014.7.1/2018.10.11	0	0	0	0	0	0	1	Baoshan in Shanghai	59	3	2	11	3					2		1	1	1	1	2	6	1	1	1	1	2	3	1
28	28-A	female	60		2014.7.1/2018.10.11	0	0	0	0	0	0	1	Baoshan in Shanghai	60	2	2	11	3					2		1	2	1	2	2	1	1	1	1	1	4	2	1
28	28-B	male	65		2014.7.1/2018.10.11	0	0	0	0	0	0	1	Baoshan in Shanghai	65	3	2	11	1	50	15	7	20	2		3	3	1	1	2	3	1	1	1	2	3	1	1
29	29-A	female	52		2014.7.1/2018.10.11	0	0	0	0	0	0	1	Baoshan in Shanghai	52	3	2	11	3					2		1	2	1	2	2	1	1	1	1	1	2	4	1
30	30-A	female	60		2014.7.1/2018.10.11	0	0	0	0	0	0	1	Baoshan in Shanghai	60	1	2	11	3					2		1	3	1	1	2	6	2	1	1	2	4	3	1
31	31-A	female	59		2014.7.1/2018.10.11	0	0	0	0	0	0	1	Baoshan in Shanghai	59	3	2	11	3					2		1	2	1	1	1	1	1	1	1	2	1	2	1
32	32-A	female	66		2014.7.1/2018.10.11	0	0	0	0	0	0	1	Baoshan in Shanghai	66	3	2	11	3					2		1	1	1	2	2	1	1	1	1	1	2	3	1
32	32-B	male	69	Dead	2014.7.1/2018.10.11	8	8	5	5	3	3	1	Baoshan in Shanghai	69	5	2	11	1	40	30	7	10	2		1,2，,3	1	1	2	2	1	1	1	3	3	3	3	2
33	33-A	male	69		2014.7.1/2018.10.11	0	0	0	0	0	0	1	Baoshan in Shanghai	69	2	2	11	3					1	30	1,2,3,4	2	1	1	2	1	2	3	1	2	2	4	1
33	33-B	female	68		2014.7.1/2018.10.11	0	0	0	0	0	0	1	Baoshan in Shanghai	68	2	2	11	3					2		1	2	1	1	2	2	2,3,5	1	2	2	3	2	1
34	34-A	male	70		2014.7.1/2018.10.11	0	0	0	0	0	0	1	Baoshan in Shanghai	70	5	2	11	3					2		1	3	1	1	1	2,6	1	2	1	1	2	4	1
34	34-B	female	70		2014.7.1/2018.10.11	0	0	0	0	0	0	1	Baoshan in Shanghai	70	4	2	11	3					2		1	1	1	1	2	2	2	1	3	2	3	4	1
35	35-A	female	82	Dead	2014.7.1/2018.10.11	0	0	0	0	0	0	1	Baoshan in Shanghai	82	3	5	11	3					2		1	2	1	1	2	2	1	3	2	2	3	2	2
36	36-A	female	54		2014.7.1/2018.10.11	0	0	0	0	0	0	1	Baoshan in Shanghai	54	4	2	11	3					2		1	1	1	2	2	1	1	1	1	1	2	3	1
36	36-B	male	58		2014.7.1/2018.10.11	0	0	0	0	0	0	1	Baoshan in Shanghai	58	4	2	11	1	18	40	7	20	1	30	1	2	1	2	2	1	1	1	1	2	2	4	1
37	37-A	female	57		2014.7.1/2018.10.11	0	0	0	0	0	0	1	Baoshan in Shanghai	57	3	2	11	3					2		1	1	1	2	2	1	2,3	3	1	3	2	4	1
38	38-A	male	71		2014.7.1/2018.10.11	0	0	0	0	0	0	1	Baoshan in Shanghai	71	2	2	11	1	30	30	7	40	2		1	3	1	1	2	1	1	1	1	1	1	4	1
38	38-B	female	69		2014.7.1/2018.10.11	0	0	0	0	0	0	1	Baoshan in Shanghai	69	1	2	11	3					2		1	3	1	1	2	1	1	1	1	1	2	4	1
39	39-A	female	64		2014.7.1/2018.10.11	0	0	0	0	0	0	1	Baoshan in Shanghai	64	3	2	11	3					2		1	2	1	1	2	1	1	1	1	1	2	3	1
39	39-B	male	67		2014.7.1/2018.10.11	0	0	0	0	0	0	1	Baoshan in Shanghai	67	5	2	11	3					2		1	2	1	2	2	1	1	1	1	1	2	4	1
39	39-C	female	35		2014.7.1/2018.10.11	0	0	0	0	0	0	1	Baoshan in Shanghai	35	5	1	1	3					2		1	2	1	1	2	1	2,4	1	1	1	3	3	1
40	40-A	female	61		2014.7.1/2018.10.11	0	0	0	0	0	0	1	Baoshan in Shanghai	61	4	2	11	1	59	3	7	10	1	10	1,2,4	2	1	2	2	1	1	1	1	1	1	4	1
41	41-A	female	61		2014.7.1/2018.10.11	7	7	5	5	4	4	1	Baoshan in Shanghai	61	3	2	11	3					2		1,2,3,4	3	1	2	2	1	1	1	1	3	1	2	1
42	42-A	female	80		2014.7.1/2018.10.11	0	0	0	0	0	0	1	Baoshan in Shanghai	80	3	2	11	3					2		1	2	1	2	2	1	1	1	1	1	1	4	1
42	42-B	male	81		2014.7.1/2018.10.11	0	0	0	0	0	0	1	Baoshan in Shanghai	81	3	2	11	3					2		1	3	1	2	2	1	1	1	1	1	2	3	1
43	43-A	female	54		2014.7.1/2018.10.11	0	0	0	0	0	0	1	Baoshan in Shanghai	54	4	2	11	3					2		1	1	1	2	2	6	1	1	1	1	3	1	1
43	43-B	male	62		2014.7.1/2018.10.11	0	0	0	0	0	0	1	Baoshan in Shanghai	62	3	2	11	3					2		1	1	1	2	2	1	1	1	1	2	3	1	1
44	44-A	female	63	Lost to follow-up	2014.7.1/2018.10.11	0	0	0	0	0	0	1	Baoshan in Shanghai	63	3	4	11	3					2		1	2	1	2	2	1	1	1	1	1	3	3	1
45	45-A	male	59		2014.7.1/2018.10.11	0	0	0	0	0	0	1	Baoshan in Shanghai	59	4	2	11	1	49	10	7	10	2		1	3	1	1	2	1	1	1	1	2	1	4	1
45	45-B	female	47		2014.7.1/2018.10.11	0	0	0	0	0	0	1	Baoshan in Shanghai	47	1	2	11	3					2		1,2,3	2	1	2	2	1	1	1	4	2	2	4	1
46	46-A	female	56		2014.7.1/2018.10.11	0	0	0	0	0	0	1	Baoshan in Shanghai	56	4	2	11	3					1	20	1	1	1	2	2	1	1	1	1	1	2	3	1
47	47-A	female	45		2014.7.1/2018.10.11	0	0	0	0	0	0	1	Baoshan in Shanghai	20	3	2	12	3					2		1	3	1	2	2	1	1	1	3	3	1	2	2
48	48-A	male	71		2014.7.1/2018.10.11	0	0	0	0	0	0	1	Baoshan in Shanghai	71	3	2	11	3					2		1	2	1	1	1	1	1	1	1	1	2	4	1
48	48-B	female	68		2014.7.1/2018.10.11	0	0	0	0	0	0	1	Baoshan in Shanghai	68	2	2	11	3					2		1	2	1	1	2	2	1	1	1	1	2	4	1
49	49-A	female	56		2014.7.1/2018.10.11	0	0	0	0	0	0	1	Baoshan in Shanghai	56	4	2	11	3					2		1,2,3	3	2	2	2	6	1	2	3	3	1	4	2
50	50-A	female	62		2014.7.1/2018.10.11	0	0	0	0	0	0	1	Baoshan in Shanghai	62	3	2	11	3					2		1	1	1	2	2	1	5	1	1	3	1	2	1
51	51-A	female	72		2014.7.1/2018.10.11	0	0	0	0	0	0	1	Baoshan in Shanghai	72	3	5	11	3					2		1	1	1	1	2	1	1	1	1	1	2	4	1
52	52-A	female	82		2014.7.1/2018.10.11	0	0	0	0	0	0	1	Baoshan in Shanghai	82	1	2	11	3					2		1	1	1	1	2	1	1	1	1	1	2	4	1
52	52-B	male	82		2014.7.1/2018.10.11	0	1	0	6	0	9	1	Baoshan in Shanghai	82	1	2	11	3					2		1	3	1	1	2	1	1	1	1	1	2	4	1
53	53-A	female	73		2014.7.1/2018.10.11	0	0	0	0	0	0	1	Baoshan in Shanghai	73	2	2	11	3					2		1	1	1	2	2	5	1	1	1	2	1	4	1
53	53-B	male	79		2014.7.1/2018.10.11	0	0	0	0	0	0	1	Baoshan in Shanghai	79	5	2	11	2					1	5	1	1	1	2	2	1	1	1	1	2	1	2	1
54	54-A	male	78		2014.7.1/2018.10.11	0	0	0	0	0	0	1	Baoshan in Shanghai	78	2	2	11	3					2		1	2	1	1	2	3	1	1	1	2	1	2	1
54	54-B	female	72		2014.7.1/2018.10.11	0	0	0	0	0	0	1	Baoshan in Shanghai	72	2	2	11	3					1	30	1	2	1	2	2	1	1	4	1	2	1	4	1
55	55-A	female	60		2014.7.1/2018.10.11	0	0	0	0	0	0	1	Baoshan in Shanghai	60	2	2	11	3					2		1	2	1	2	2	1	1	3	3	3	2	4	2
56	56-A	female	80		2014.7.1/2018.10.11	0	0	0	0	0	0	1	Baoshan in Shanghai	80	2	5	11	3					2		5	1	1	1	2	2	2	4	3	3	1	4	2
57	57-A	male	64		2014.7.1/2018.10.11	0	0	0	0	0	0	1	Baoshan in Shanghai	64	4	2	11	3					2		1	2	1	2	2	1	1	1	1	2	2	4	1
58	58-A	female	66		2014.7.1/2018.10.11	0	0	0	0	0	0	1	Baoshan in Shanghai	66	2	2	11	3					2		1	2	1	2	2	6	2	3	3	2	2	4	1
59	59-A	male	61		2014.7.1/2018.10.11	0	0	0	0	0	0	1	Baoshan in Shanghai	61	5	2	11	3					1	45	1	2	1	1	2	1	1	1	1	2	2	4	1
60	60-A	male	72		2014.7.1/2018.10.11	0	0	0	0	0	0	1	Baoshan in Shanghai	72	4	2	11	1	42	30	7	6	2		1	1	1	2	2	1	1	1	1	2	1	1	1
61	61-A	female	65		2014.7.1/2018.10.11	0	0	0	0	0	0	1	Baoshan in Shanghai	65	3	5	11	3					2		1	2	1	2	2	1	1	2	1	2	2	4	1
62	62-A	male	84		2014.7.1/2018.10.11	0	0	0	0	0	0	1	Baoshan in Shanghai	84	3	5	11	3					2		1	2	1	2	2	6	1	2	1	2	2	4	1
63	63-A	female	76		2014.7.1/2018.10.11	1	1	9	4	9	9	1	Baoshan in Shanghai	76	4	2	11	3					2		1	2	1	2	2	1	1	1	1	1	2	4	1
64	64-A	female	67		2014.7.1/2018.10.11	7	7	5	5	4	4	1	Baoshan in Shanghai	67	1	2	11	3					2		1	2	1	1	2	1	1	1	1	1	2	4	1
64	64-B	male	70		2014.7.1/2018.10.11	0	0	0	0	0	0	1	Baoshan in Shanghai	70	4	2	11	3					1	6	1	2	1	1	2	1	1	1	1	2	1	1	1
65	65-A	male	60		2014.7.1/2018.10.11	0	0	0	0	0	0	1	Baoshan in Shanghai	60	4	2	11	2					1		1	2	1	1	2	1	1	1	1	1	1	2	1
66	66-A	female	69	Lost to follow-up	2014.7.1/2018.10.11	0	0	0	0	0	0	1	Baoshan in Shanghai	45	1	5	11	3					2		1	2	1	2	2	1	1	1	1	1	2	4	1
67	67-A	female	54		2014.7.1/2018.10.11	0	0	0	0	0	0	1	Baoshan in Shanghai	54	3	2	11	3					2		1,4	1	1	2	2	6	2,8	3	2	2	2	4	2
68	68-A	female	66		2014.7.1/2018.10.11	0	0	0	0	0	0	1	Baoshan in Shanghai	66	3	2	11	3					2		1	2	1	1	2	1	1	2	1	1	2	4	1
68	68-B	male	67		2014.7.1/2018.10.11	0	0	0	0	0	0	1	Baoshan in Shanghai	67	2	2	11	2					2		1	3	1	2	2	1	1	3	1	2	4	4	1
69	69-A	female	66		2014.7.1/2018.10.11	0	0	0	0	0	0	1	Baoshan in Shanghai	66	2	5	11	3					2		1	1	1	2	2	1	1	1	1	2	1	1	1
70	70-A	male	67		2014.7.1/2018.10.11	0	0	0	0	0	0	1	Baoshan in Shanghai	67	3	2	11	3					2		1	3	1	1	2	1	1	1	1	2	2	4	1
70	70-B	female	68		2014.7.1/2018.10.11	0	0	0	0	0	0	1	Baoshan in Shanghai	68	2	2	11	3					2		1,2	2	1	2	2	1	1	1	1	2	2	4	1
71	71-A	male	76		2014.7.2/2018.10.18	0	0	0	0	0	0	1	Baoshan in Shanghai	76	5	2	11	3					2		1	3	1	2	2	1	1	1	1	1	2	4	1
71	71-B	female	73		2014.7.2/2018.10.18	0	0	0	0	0	0	1	Baoshan in Shanghai	73	4	2	11	3					2		1	1	1	1	2	1	1	1	1	1	4	3	1
72	72-A	female	61		2014.7.2/2018.10.18	0	0	0	0	0	0	1	Baoshan in Shanghai	61	3	2	11	3					2		2,3	3	1	1	2	1	1	1	1	2	3	4	1
72	72-B	male	60		2014.7.2/2018.10.18	0	0	0	0	0	0	1	Baoshan in Shanghai	60	3	2	11	1	30	30	7	20	2		1	3	2	2	2	1	1	1	1	2	1	4	1
73	73-A	male	64		2014.7.2/2018.10.18	0	0	0	0	0	0	1	Baoshan in Shanghai	64	3	2	11	3					2		1	2	1	2	2	6	1	1	1	1	2	4	1
73	73-B	female	64		2014.7.2/2018.10.18	0	0	0	0	0	0	1	Baoshan in Shanghai	64	2	2	11	3					2		1	3	1	1	2	1	5	1	1	2	4	1	1
74	74-A	male	74		2014.7.2/2018.10.18	0	1	0	5	0	9	1	Baoshan in Shanghai	74	3	2	11	3					2		1	3	2	1	2	1	1	1	1	2	2	4	1
75	75-A	female	68		2014.7.2/2018.10.18	0	0	0	0	0	0	1	Baoshan in Shanghai	68	2	5	11	3					2		1	2	1	1	2	1	2,5	1	1	2	2	3	1
76	76-A	male	78		2014.7.2/2018.10.18	4	0	8	0	9	0	1	Baoshan in Shanghai	78	2	2	11	3					2		1	3	1	2	2	1	1	1	1	1	2	3	1
76	76-B	female	76		2014.7.2/2018.10.18	0	0	0	0	0	0	1	Baoshan in Shanghai	76	2	2	11	3					2		1	3	1	1	1	1	1	1	1	2	1	2	1
77	77-A	male	67	Lost to follow-up	2014.7.2/2018.10.18	0	0	0	0	0	0	1	Baoshan in Shanghai	67	5	2	11	3					2		1	2	1	1	2	1	1	1	1	1	2	4	1
78	78-A	male	68		2014.7.2/2018.10.18	0	0	0	0	0	0	1	Baoshan in Shanghai	68	3	2	2	3					2		1	2	2	1	1	2	2,3	2	2	2	1	4	1
78	78-B	female	62		2014.7.2/2018.10.18	0	0	0	0	0	0	1	Baoshan in Shanghai	62	3	2	2	3					2		1	1	1	1	2	1	2	2	2	2	2	2	1
79	79-A	male	60		2014.7.2/2018.10.18	0	0	0	0	0	0	1	Baoshan in Shanghai	60	3	2	11	3					2		1	3	1	1	2	2	1	1	1	1	2	4	1
79	79-B	female	26		2014.7.2/2018.10.18	2	2	5	5	2	10	1	Baoshan in Shanghai	26	2	1	12	3					2		1	2	1	2	2	1	1	1	1	1	2	4	1
80	80-A	female	70		2014.7.2/2018.10.18	0	0	0	0	0	0	1	Baoshan in Shanghai	70	4	2	11	3					2		1	2	1	2	2	1	1	1	1	1	2	4	1
81	81-A	female	62		2014.7.2/2018.10.18	0	0	0	0	0	0	1	Baoshan in Shanghai	62	3	2	11	3					2		1	2	1	1	2	1	1	1	2	1	2	3	1
82	82-A	female	66		2014.7.2/2018.10.18	0	0	0	0	0	0	1	Baoshan in Shanghai	66	3	2	11	3					2		1	1	1	1	1	1	2	1	1	2	1	4	1
83	83-A	female	61		2014.7.2/2018.10.18	0	0	0	0	0	0	1	Baoshan in Shanghai	61	3	2	11	3					2		1	2	1	2	2	1	1	1	1	1	2	2	1
84	84-A	female	67		2014.7.2/2018.10.18	0	0	0	0	0	0	1	Baoshan in Shanghai	67	3	2	11	3					2		1	1	1	1	2	6	7,8	4	4	2	4	4	2
85	85-A	male	65		2014.7.2/2018.10.18	8	8	5	5	2	2	1	Baoshan in Shanghai	65	4	2	11	3					2		1	3	1	2	1	6	1	1	2	1	2	4	1
85	85-B	female	61		2014.7.2/2018.10.18	0	0	0	0	0	0	1	Baoshan in Shanghai	61	3	2	11	3					2		1	2	1	2	2	6	1	1	1	1	2	2	1
86	86-A	female	57		2014.7.2/2018.10.18	0	0	0	0	0	0	1	Baoshan in Shanghai	57	3	2	11	3					2		1	1	1	2	2	1	2	1	1	2	1	4	1
87	87-A	female	65		2014.7.2/2018.10.18	0	0	0	0	0	0	1	Baoshan in Shanghai	65	2	2	11	3					2		1	1	1	2	2	6	2	1	1	2	1	1	1
87	87-B	male	69		2014.7.2/2018.10.18	1	1	9	4	9	8	1	Baoshan in Shanghai	69	2	2	11	1	34	35	7	20	2		1	1	1	2	2	1	1	1	1	2	1	4	1
88	88-A	female	43		2014.7.2/2018.10.18	0	0	0	0	0	0	1	Baoshan in Shanghai	43	4	2	14	3					2		1	1	1	2	2	1	1	1	1	2	4	3	1
89	89-A	male	63		2014.7.2/2018.10.18	0	0	0	0	0	0	1	Baoshan in Shanghai	63	4	2	11	3					2		1	3	1	2	2	1	1	2	1	2	2	4	1
90	90-A	male	70		2014.7.2/2018.10.18	0	0	0	0	0	0	1	Baoshan in Shanghai	70	4	2	11	3					2		1	2	1	2	2	1	1	1	1	2	1	4	1
91	91-A	female	49		2014.7.2/2018.10.18	1	1	1	3	8	8	1	Baoshan in Shanghai	49	4	5	9	3					2		1,2,3	1	1	2	2	1	1	1	1	2	4	4	1
92	92-A	female	59	Lost to follow-up	2014.7.2/2018.10.18	0	0	0	0	0	0	1	Baoshan in Shanghai	30	1	2	11	3					2		1	2	2	2	2	1	1	2	1	2	1	4	1
93	93-A	female	62		2014.7.2/2018.10.18	0	0	0	0	0	0	1	Baoshan in Shanghai	62	3	2	11	3					2		1	1	1	2	2	1	1	1	1	2	4	1	1
93	93-B	male	64		2014.7.2/2018.10.18	0	0	0	0	0	0	1	Baoshan in Shanghai	64	5	2	11	3					2		1	2	1	1	2	1	1	2	1	2	3	4	1
94	94-A	male	59		2014.7.2/2018.10.18	0	0	0	0	0	0	1	Baoshan in Shanghai	59	4	2	9	1	16	43	7	10	1	40	1	3	1	2	2	1	1	1	1	2	3	3	1
94	94-B	female	58		2014.7.2/2018.10.18	0	0	0	0	0	0	1	Baoshan in Shanghai	58	2	2	11	3					2		1	1	1	1	2	1	2	1	1	2	1	2	1
95	95-A	male	65		2014.7.2/2018.10.18	0	0	0	0	0	0	1	Baoshan in Shanghai	65	2	2	11	3					2		1	2	1	1	2	6	1	1	2	1	2	4	1
95	95-B	female	63		2014.7.2/2018.10.18	0	0	0	0	0	0	1	Baoshan in Shanghai	63	3	2	11	3					2		1	2	1	1	2	1	1	2	1	2	3	3	1
96	96-A	male	61		2014.7.2/2018.10.18	0	0	0	0	0	0	1	Baoshan in Shanghai	61	4	2	11	3					2		1	2	1	2	2	1	1	1	1	2	3	2	1
97	97-A	male	24		2014.7.2/2018.10.18	0	0	0	0	0	0	1	Baoshan in Shanghai	24	5	1	4	3					2		3	1	1	2	2	1	1	1	3	2	3	3	1
98	98-A	female	36		2014.7.2/2018.10.18	0	0	0	0	0	0	1	Baoshan in Shanghai	10	3	2	11	3					2		1	2	1	2	2	1	1	2	2	2	2	3	1
99	99-A	female	52	Lost to follow-up	2014.7.2/2018.10.18	0	0	0	0	0	0	1	Baoshan in Shanghai	52	4	2	11	3					2		1	1	1	2	2	1	2,7	1	1	2	3	2	1
100	100-A	male	68		2014.7.2/2018.10.18	0	0	0	0	0	0	1	Baoshan in Shanghai	68	4	2	11	3					2		1	2	1	2	1	1	1	2	2	1	2	4	1
100	100-B	female	64		2014.7.2/2018.10.18	0	0	0	0	0	0	1	Baoshan in Shanghai	64	3	2	11	3					2		1,2	1	1	1	2	1	1	1	1	2	3	1	2
101	101-A	male	17		2014.7.2/2018.10.18	0	0	0	0	0	0	1	Baoshan in Shanghai	17	4	1	13	3					2		1	1	1	2	2	1	2	4	3	3	3	3	2
102	102-A	female	48		2014.7.2/2018.10.18	0	0	0	0	0	0	1	Baoshan in Shanghai	48	5	2	1	3					2		1	2	1	2	2	1	1	1	1	1	3	2	1
103	103-A	female	57		2014.7.2/2018.10.18	0	0	0	0	0	0	1	Baoshan in Shanghai	57	4	2	11	3					2		1	2	1	2	2	1	1	1	1	2	1	1	1
104	104-A	female	56		2014.7.2/2018.10.18	0	0	0	0	0	0	1	Baoshan in Shanghai	56	4	2	11	3					2		1	2	1	2	2	1	1	1	1	1	2	3	1
105	105-A	male	56		2014.7.2/2018.10.18	0	0	0	0	0	0	1	Baoshan in Shanghai	56	4	2	9	3					2		5	1	1	2	2	1	1	1	1	2	1	2	2
106	106-A	female	49		2014.7.2/2018.10.18	0	0	0	0	0	0	1	Baoshan in Shanghai	49	4	2	11	3					2		1	2	1	2	2	1	1	1	1	1	2	3	1
107	107-A	female	58		2014.7.2/2018.10.18	0	0	0	0	0	0	1	Baoshan in Shanghai	58	3	2	11	3					2		1	2	1	2	2	1	1	2	2	1	2	4	1
108	108-A	male	59		2014.7.2/2018.10.18	0	0	0	0	0	0	1	Baoshan in Shanghai	59	4	2	5	3					2		1	1	1	2	2	1	1	1	1	2	1	4	1
109	109-A	male	63		2014.7.2/2018.10.18	0	0	0	0	0	0	1	Baoshan in Shanghai	63	3	2	11	3					2		1	3	1	2	2	1	1	1	1	2	2	4	1
110	110-A	female	46		2014.7.2/2018.10.18	0	0	0	0	0	0	1	Baoshan in Shanghai	46	4	2	9	3					2		1	2	1	2	2	1	1	1	3	2	2	4	1
111	111-A	male	50		2014.7.2/2018.10.18	0	0	0	0	0	0	1	Baoshan in Shanghai	50	4	2	9	1	20	30	7	20	1	30	1,2	3	3	2	2	1	1	1	4	2	1	4	1
112	112-A	female	61		2014.7.2/2018.10.18	0	0	0	0	0	0	1	Baoshan in Shanghai	61	2	2	11	3					2		1	2	1	2	2	1	1	1	1	2	2	4	1
112	112-B	male	61		2014.7.2/2018.10.18	0	0	0	0	0	0	1	Baoshan in Shanghai	61	3	2	11	3					2		1	2	1	2	2	1	1	1	1	2	2	4	1
113	113-A	male	52		2014.7.2/2018.10.18	0	0	0	0	0	0	1	Baoshan in Shanghai	52	3	4	11	3					2		1	2	1	2	2	1	1	1	1	1	2	4	1
114	114-A	male	59		2014.7.2/2018.10.18	0	0	0	0	0	0	1	Baoshan in Shanghai	59	3	2	9	3					2		1	2	1	2	2	1	1	1	1	2	1	3	1
115	115-A	male	70		2014.7.2/2018.10.18	0	0	0	0	0	0	1	Baoshan in Shanghai	70	3	2	11	1	30	40	7	2	1	40	1	3	1	1	2	1	1	1	1	2	1	4	1
115	115-B	female	67		2014.7.2/2018.10.18	1	0	7	0	9	0	1	Baoshan in Shanghai	67	2	2	11	3					2		1,2	2	1	1	2	1	1	1	1	2	1	4	1
116	116-A	female	65		2014.7.2/2018.10.18	0	0	0	0	0	0	1	Baoshan in Shanghai	65	5	2	11	3					2		1	1	1	2	2	1	1	1	1	2	3	4	1
117	117-A	male	42		2014.7.2/2018.10.18	0	0	0	0	0	0	1	Baoshan in Shanghai	42	5	2	8	3					2		1	1	1	2	2	1	2	1	1	1	1	1	1
117	117-B	female	42		2014.7.2/2018.10.18	0	0	0	0	0	0	1	Baoshan in Shanghai	42	5	2	7	3					2		1	1	1	2	2	1	1	1	1	1	1	1	1
118	118-A	male	65		2014.7.2/2018.10.18	8	8	5	5	3	3	1	Baoshan in Shanghai	65	3	2	11	3					2		1	3	2	2	2	1	1	1	1	1	3	4	1
119	119-A	female	61		2014.7.2/2018.10.18	0	0	0	0	0	0	1	Baoshan in Shanghai	61	3	2	11	3					2		1	2	1	2	2	1	1	1	2	1	2	4	1
120	120-A	male	86	Dead	2014.7.2/2018.10.18	0	0	0	0	0	0	1	Baoshan in Shanghai	86	3	2	11	3					2		1	2	1	1	2	1	1	3	3	1	2	4	1
121	121-A	female	55		2014.7.2/2018.10.18	0	0	0	0	0	0	1	Baoshan in Shanghai	55	2	2	11	3					2		1	2	1	2	2	1	1	1	1	1	2	4	1
122	122-A	male	67		2014.7.2/2018.10.18	0	0	0	0	0	0	1	Baoshan in Shanghai	67	4	2	11	3					2		1	3	1	1	2	2	1	1	2	1	2	4	1
123	123-A	male	66		2014.7.2/2018.10.18	0	0	0	0	0	0	1	Baoshan in Shanghai	66	2	2	11	3					2		1	3	1	1	2	1	1	1	1	1	2	4	1
124	124-A	female	75		2014.7.2/2018.10.18	0	0	0	0	0	0	1	Baoshan in Shanghai	75	1	2	11	3					2		1	2	1	2	2	1	1	1	2	1	1	4	1
125	125-A	female	60		2014.7.2/2018.10.18	0	0	0	0	0	0	1	Baoshan in Shanghai	60	3	2	11	3					2		1	2	1	1	2	1	1	1	1	2	1	4	1
126	126-A	female	39		2014.7.2/2018.10.18	0	0	0	0	0	0	1	Baoshan in Shanghai	39	3	2	11	3					2		1	2	1	2	2	1	1	1	1	2	3	3	1
127	127-A	male	57	Lost to follow-up	2014.7.2/2018.10.18	0	0	0	0	0	0	1	Baoshan in Shanghai	57	3	2	11	3					2		1	3	1	1	2	1	1	2	1	2	1	4	1
128	128-A	female	54		2014.7.2/2018.10.18	0	0	0	0	0	0	1	Baoshan in Shanghai	54	4	2	11	3					2		1	2	1	2	2	1	1	2	1	1	2	4	1
129	129-A	male	72		2014.7.2/2018.10.18	0	0	0	0	0	0	1	Baoshan in Shanghai	72	4	2	11	3					2		1	1	1	2	1	3	4,7	1	2	1	2	3	1
130	130-A	female	47		2014.7.2/2018.10.18	0	0	0	0	0	0	1	Baoshan in Shanghai	47	5	2	1	3					2		1	1	1	2	2	1	1	1	1	1	4	2	1
131	131-A	female	77		2014.7.2/2018.10.18	0	0	0	0	0	0	1	Baoshan in Shanghai	77	1	2	11	3					2		1	3	1	1	1	1	1	1	1	1	2	4	1
132	132-A	female	57		2014.7.2/2018.10.18	0	0	0	0	0	0	1	Baoshan in Shanghai	57	4	2	11	3					2		1	2	1	2	2	2	1	1	2	1	1	4	1
133	133-A	male	78		2014.7.2/2018.10.18	0	0	0	0	0	0	1	Baoshan in Shanghai	78	4	2	11	3					2		1	3	1	1	2	1	1	1	1	2	2	4	1
134	134-A	female	61		2014.7.2/2018.10.18	0	0	0	0	0	0	1	Baoshan in Shanghai	61	4	2	11	3					2		1	2	1	2	2	1	1	1	1	1	2	4	1
135	135-A	female	54		2014.7.2/2018.10.18	0	0	0	0	0	0	1	Baoshan in Shanghai	54	3	2	11	3					2		1	3	1	2	1	1	1	1	2	1	2	4	1
136	136-A	female	77		2014.7.2/2018.10.18	0	0	0	0	0	0	1	Baoshan in Shanghai	77	1	2	11	3					2		1	2	1	1	1	2	1	1	1	1	2	4	1
137	137-A	female	90		2014.7.2/2018.10.18	0	0	0	0	0	0	1	Baoshan in Shanghai	90	1	4	11	3					2		1	2	1	1	2	1	1	1	2	1	2	4	1
138	138-A	female	55		2014.7.2/2018.10.18	0	0	0	0	0	0	1	Baoshan in Shanghai	55	4	2	11	3					2		1	3	1	1	2	1	1	1	1	2	2	4	1
139	139-A	female	57		2014.7.2/2018.10.18	0	0	0	0	0	0	1	Baoshan in Shanghai	57	4	2	11	3					2		1	2	1	1	2	1	1	2	1	2	2	4	1
140	140-A	female	59		2014.7.2/2018.10.18	1	1	5	3	8	8	1	Baoshan in Shanghai	59	4	2	11	3					2		1	2	1	1	2	1	1	1	1	2	2	4	1
141	141-A	male	79		2014.7.2/2018.10.18	0	0	0	0	0	0	1	Baoshan in Shanghai	79	3	2	11	3					2		1	3	1	2	2	1	1	1	1	2	2	4	1
142	142-A	female	81		2014.7.2/2018.10.18	0	0	0	0	0	0	1	Baoshan in Shanghai	81	1	2	11	3					2		1	2	1	2	2	1	1	1	1	2	2	4	1
142	142-B	male	80		2014.7.2/2018.10.18	0	0	0	0	0	0	1	Baoshan in Shanghai	80	1	2	11	3					2		1	2	1	2	2	1	1	1	1	2	1	4	1
143	143-A	male	72		2014.7.2/2018.10.18	0	0	0	0	0	0	1	Baoshan in Shanghai	72	5	2	11	3					2		1	3	1	2	1	2	1	2	1	2	2	2	1
144	144-A	female	57		2014.7.2/2018.10.18	0	0	0	0	0	0	1	Baoshan in Shanghai	57	4	2	11	3					2		1	1	1	2	2	1	2	1	1	2	3	3	1
144	144-B	female	31		2014.7.2/2018.10.18	0	0	0	0	0	0	1	Baoshan in Shanghai	31	3	1	12	3					2		1	1	1	2	2	1	1	1	1	2	1	1	1
145	145-A	female	84		2014.7.2/2018.10.18	0	0	0	0	0	0	1	Baoshan in Shanghai	84	1	2	11	3					2		1	2	1	1	2	1	1	2	1	2	2	4	1
146	146-A	female	75		2014.7.2/2018.10.18	0	0	0	0	0	0	1	Baoshan in Shanghai	75	1	2	11	3					2		1	2	1	1	2	1	1	1	2	2	2	4	1
146	146-B	male	74		2014.7.2/2018.10.18	0	0	0	0	0	0	1	Baoshan in Shanghai	74	4	2	11	3					2		1	2	1	2	2	1	1	2	1	2	2	4	1
147	147-A	male	67		2014.7.2/2018.10.18	0	0	0	0	0	0	1	Baoshan in Shanghai	67	3	2	11	3					2		1,2	2	1	1	2	3	1	1	1	2	1	4	1
148	148-A	female	58	Lost to follow-up	2014.7.2/2018.10.18	0	0	0	0	0	0	1	Baoshan in Shanghai	58	4	5	11	3					2		1	3	1	1	1	1	2,3,5,7	5	1	2	3	4	1
149	149-A	female	63		2014.7.2/2018.10.18	0	0	0	0	0	0	1	Baoshan in Shanghai	63	3	2	11	3					2		1	2	1	2	2	1	1	2	1	2	2	4	1
150	150-A	male	72		2014.7.2/2018.10.18	0	0	0	0	0	0	1	Baoshan in Shanghai	72	5	2	11	3					2		1	2	1	1	2	1	1	2	1	2	2	4	1
150	150-B	female	71		2014.7.2/2018.10.18	0	0	0	0	0	0	1	Baoshan in Shanghai	71	2	2	11	3					2		1	2	1	2	2	1	1	2	1	2	2	4	1
151	151-A	male	83		2014.7.3/2018.10.25	0	0	0	0	0	0	1	Baoshan in Shanghai	83	3	2	11	3					2		1	2	1	1	1	2	1	1	1	1	1	4	1
151	151-B	female	83		2014.7.3/2018.10.25	0	0	0	0	0	0	1	Baoshan in Shanghai	83	3	2	11	3					2		1	2	1	1	1	1	1	1	1	1	1	4	1
152	152-A	female	78		2014.7.3/2018.10.25	0	0	0	0	0	0	1	Baoshan in Shanghai	78	2	2	11	3					2		1	2	1	1	2	2	1	1	1	1	1	4	1
153	153-A	female	85		2014.7.3/2018.10.25	2	0	5	0	4	0	1	Baoshan in Shanghai	85	2	2	11	3					2		1	2	1	2	2	1	1	1	1	1	1	4	1
153	153-B	male	84		2014.7.3/2018.10.25	0	0	0	0	0	0	1	Baoshan in Shanghai	84	4	2	11	3					2		1	2	1	2	2	6	1	1	1	1	1	4	1
154	154-A	female	78		2014.7.3/2018.10.25	0	0	0	0	0	0	1	Baoshan in Shanghai	78	1	2	11	3					2		1	2	1	2	2	1	1	1	1	1	1	4	1
155	155-A	female	67		2014.7.3/2018.10.25	0	0	0	0	0	0	1	Baoshan in Shanghai	67	1	2	11	3					2		1	2	1	1	2	1	1	1	1	1	1	4	1
156	156-A	female	57		2014.7.3/2018.10.25	0	0	0	0	0	0	1	Baoshan in Shanghai	57	4	2	11	3					2		2	1	1	2	2	6	1	3	1	2	2	3	1
157	157-A	female	53	Lost to follow-up	2014.7.3/2018.10.25	0	0	0	0	0	0	1	Baoshan in Shanghai	53	4	2	11	3					2		3	2	1	2	2	1	1	2	2	1	3	4	1
158	158-A	female	63		2014.7.3/2018.10.25	0	0	0	0	0	0	1	Baoshan in Shanghai	63	3	2	11	3					2		1	2	1	2	2	1	1	2	3	1	2	4	1
159	159-A	female	70		2014.7.3/2018.10.25	0	0	0	0	0	0	1	Baoshan in Shanghai	70	3	2	11	3					2		1	2	1	1	1	6	1	2	2	3	3	4	1
160	160-A	female	76		2014.7.3/2018.10.25	0	0	0	0	0	0	1	Baoshan in Shanghai	76	3	2	11	3					2		1	2	1	1	2	1	1	2	1	2	2	3	1
160	160-B	male	84		2014.7.3/2018.10.25	0	0	0	0	0	0	1	Baoshan in Shanghai	60	3	2	11	3					2		1	2	1	1	2	1	1	1	1	1	2	4	1
161	161-A	female	74		2014.7.3/2018.10.25	0	0	0	0	0	0	1	Baoshan in Shanghai	74	4	2	11	3					2		1	2	1	1	2	2	1	3	2	2	1	4	1
162	162-A	female	32		2014.7.3/2018.10.25	0	0	0	0	0	0	1	Baoshan in Shanghai	6	3	2	12	3					2		3	1	1	2	2	1	1	1	1	1	4	2	1
163	163-A	female	49		2014.7.3/2018.10.25	0	0	0	0	0	0	1	Baoshan in Shanghai	49	4	2	1	3					2		1	1	1	2	2	1	1	1	1	1	3	2	1
164	164-A	male	83		2014.7.3/2018.10.25	0	2	0	5	0	4	1	Baoshan in Shanghai	83	4	2	11	3					2		1	3	1	1	2	2	1	3	3	2	2	4	1
165	165-A	male	54		2014.7.3/2018.10.25	0	0	0	0	0	0	1	Baoshan in Shanghai	54	4	4	11	3					2		3	3	1	1	2	1	1	3	2	2	2	4	1
166	166-A	female	61		2014.7.3/2018.10.25	0	0	0	0	0	0	1	Baoshan in Shanghai	61	3	2	11	3					2		2	3	1	2	2	1	1	2	2	2	2	4	1
167	167-A	female	65		2014.7.3/2018.10.25	0	0	0	0	0	0	1	Baoshan in Shanghai	65	3	2	11	3					2		1	2	1	1	1	1	1	2	1	1	2	4	1
167	167-B	male	61		2014.7.3/2018.10.25	0	0	0	0	0	0	1	Baoshan in Shanghai	30	2	2	11	3					2		1	2	1	1	2	1	1	2	1	2	2	4	1
168	168-A	male	54		2014.7.3/2018.10.25	0	0	0	0	0	0	1	Baoshan in Shanghai	54	3	2	11	3					2		3	2	1	1	2	2	1	3	2	2	2	4	1
169	169-A	female	56		2014.7.3/2018.10.25	0	0	0	0	0	0	1	Baoshan in Shanghai	56	3	2	11	3					2		1	2	1	2	2	1	1	1	1	1	3	3	1
170	170-A	male	72		2014.7.3/2018.10.25	0	0	0	0	0	0	1	Baoshan in Shanghai	72	5	2	11	3					2		1	3	1	1	2	1	1	2	2	1	2	4	1
171	171-A	male	62		2014.7.3/2018.10.25	0	0	0	0	0	0	1	Baoshan in Shanghai	62	3	2	1	1	22	40	3	10	1	10	1	2	1	2	2	1	1	1	1	1	2	3	1
172	172-A	female	69		2014.7.3/2018.10.25	0	0	0	0	0	0	1	Baoshan in Shanghai	69	3	2	11	3					2		1	2	1	2	2	1	1	1	1	1	2	3	1
173	173-A	male	82		2014.7.3/2018.10.25	0	0	0	0	0	0	1	Baoshan in Shanghai	82	3	2	11	3					2		1	1	1	2	2	2	1	2	2	2	1	4	1
174	174-A	female	47		2014.7.3/2018.10.25	0	0	0	0	0	0	1	Baoshan in Shanghai	47	3	2	11	3					2		1	1	1	2	2	1	1	1	1	1	3	3	1
175	175-A	female	55		2014.7.3/2018.10.25	0	0	0	0	0	0	1	Baoshan in Shanghai	55	4	2	11	3					2		1	1	1	2	2	1	1	1	1	1	3	3	1
176	176-A	female	76		2014.7.3/2018.10.25	0	0	0	0	0	0	1	Baoshan in Shanghai	40	3	5	11	3					2		1	2	1	1	2	1	1	3	2	1	2	4	1
177	177-A	female	71		2014.7.3/2018.10.25	0	0	0	0	0	0	1	Baoshan in Shanghai	71	3	2	11	3					2		1	2	1	1	2	1	1	2	2	1	2	4	1
178	178-A	female	43	Lost to follow-up	2014.7.3/2018.10.25	0	0	0	0	0	0	1	Baoshan in Shanghai	20	2	2	11	3					2		1	2	1	2	2	1	1	2	2	2	2	4	1
179	179-A	male	50		2014.7.3/2018.10.25	0	0	0	0	0	0	1	Baoshan in Shanghai	20	4	2	1	1	20	30	7	20	2		1	2	1	2	2	1	1	1	1	2	2	4	1
179	179-B	female	43		2014.7.3/2018.10.25	4	4	2	2	1	1	1	Baoshan in Shanghai	43	4	2	9	3					2		2,3,4	1	1	2	2	1	1	3	1	2	4	4	1
180	180-A	female	45		2014.7.3/2018.10.25	0	0	0	0	0	0	1	Baoshan in Shanghai	45	4	2	1	3					2		1	1	1	2	2	1	1	1	3	2	2	3	9
180	180-B	female	21		2014.7.3/2018.10.25	0	0	0	0	0	0	1	Baoshan in Shanghai	21	4	1	12	3					2		1	1	1	2	2	1	1	1	3	1	2	1	1
181	181-A	female	54		2014.7.3/2018.10.25	0	0	0	0	0	0	1	Baoshan in Shanghai	54	4	4	11	3					2		1	1	1	2	2	1	2,5,7	3	3	2	2	2	2
182	182-A	female	58		2014.7.3/2018.10.25	0	0	0	0	0	0	1	Baoshan in Shanghai	58	3	2	2	3					2		1	3	1	1	2	2	1	3	2	1	2	4	1
183	183-A	female	59	Lost to follow-up	2014.7.3/2018.10.25	0	0	0	0	0	0	1	Baoshan in Shanghai	59	3	2	11	3					2		1	2	1	2	2	6	1	1	1	2	2	4	1
184	184-A	female	80		2014.7.3/2018.10.25	0	0	0	0	0	0	1	Baoshan in Shanghai	80	1	5	11	3					2		1	3	1	1	2	1	1	1	1	2	1	2	1
185	185-A	female	44		2014.7.3/2018.10.25	0	0	0	0	0	0	1	Baoshan in Shanghai	44	3	2	9	3					2		1	1	1	2	2	1	1	3	1	2	2	3	1
185	185-B	male	49		2014.7.3/2018.10.25	0	0	0	0	0	0	1	Baoshan in Shanghai	49	4	2	9	3					2		1	1	1	1	1	1	1	1	1	2	2	3	1
185	185-C	male	22		2014.7.3/2018.10.25	0	0	0	0	0	0	1	Baoshan in Shanghai	22	4	1	6	3					2		1	1	1	2	2	1	1	1	1	2	4	2	1
186	186-A	female	72		2014.7.3/2018.10.25	0	0	0	0	0	0	1	Baoshan in Shanghai	72	1	2	11	3					2		1	2	1	1	2	1	1	2	2	1	1	4	1
187	187-A	female	53		2014.7.3/2018.10.25	2	2	4	4,5	10	10	1	Baoshan in Shanghai	53	3	2	11	3					2		1	2	1	2	2\1	1	1	2\3	2\3	1	2	4	1
187	187-B	female	31		2014.7.3/2018.10.25	0	0	0	0	0	0	1	Baoshan in Shanghai	31	5	2	10	3					2		1	1	1	2	2	1	1	1	1	2	2	3	1
188	188-A	female	67		2014.7.3/2018.10.25	0	0	0	0	0	0	1	Baoshan in Shanghai	67	2	2	11	3					2		1	1	1	1	2	1	1	1	1	2	1	1	1
189	189-A	male	56		2014.7.3/2018.10.25	0	0	0	0	0	0	1	Baoshan in Shanghai	56	4	2	11	2					3		1	1	1	2	2	5	1	1	1	2	2	4	1
190	190-A	female	57		2014.7.3/2018.10.25	0	0	0	0	0	0	1	Baoshan in Shanghai	57	3	2	11	3					2		1	1	1	2	2	1,5	2	1	1	2	3	4	1
191	191-A	female	62		2014.7.3/2018.10.25	0	0	0	0	0	0	1	Baoshan in Shanghai	62	3	2	11	3					2		1	2	1	2	2	1	1	2	1	1	2	3	1
192	192-A	female	67		2014.7.3/2018.10.25	7	7	5	5	4	4	1	Baoshan in Shanghai	67	4	2	11	3					2		1	1	1	2	2	5	1	1	1	2	3	4	1
192	192-B	male	71		2014.7.3/2018.10.25	0	0	0	0	0	0	1	Baoshan in Shanghai	71	5	2	11	3					2		1	1	1	1	2	1	1	1	1	2	3	4	1
193	193-A	female	63		2014.7.3/2018.10.25	0	0	0	0	0	0	1	Baoshan in Shanghai	63	4	2	11	3					2		1	2	1	2	1	2,6	1	2	2	1	2	4	1
193	193-B	male	68	Lost to follow-up	2014.7.3/2018.10.25	0	0	0	0	0	0	1	Baoshan in Shanghai	68	5	2	11	3					2		1	2	1	1	2	6	1	2	2	1	2	4	1
194	194-A	female	43		2014.7.3/2018.10.25	0	0	0	0	0	0	1	Baoshan in Shanghai	43	4	2	12	1	25	18	7	20	1	3	1,2,3,4	3	1	2	2	1	1	2	3	2	2	4	1
194	194-B	female	67		2014.7.3/2018.10.25	0	0	0	0	0	0	1	Baoshan in Shanghai	67	3	5	11	3					2		1,2,3,4	3	1	1	1	1,3	2,5	1	5	3	2	4	1
195	195-A	female	44		2014.7.3/2018.10.25	0	0	0	0	0	0	1	Baoshan in Shanghai	44	4	2	11	3					2		1	2	1	2	2	1	1	1	1	2	2	4	1
196	196-A	female	66		2014.7.3/2018.10.25	0	0	0	0	0	0	1	Baoshan in Shanghai	66	2	2	11	3					2		1	2	1	2	2	1	1	2	1	2	2	4	1
197	197-A	female	58		2014.7.3/2018.10.25	1	1	3	4	8	8	1	Baoshan in Shanghai	5	1	5	10	3					2		1,2,3	1	1	2	2	1	1	2	1	2	1	1	1
198	198-A	male	78		2014.7.3/2018.10.25	0	0	0	0	0	0	1	Baoshan in Shanghai	78	1	5	11	1	28	50	7	18	2		1	1	1	1	2	1	1	3	1	1	1	4	1
199	199-A	female	79		2014.7.3/2018.10.25	0	0	0	0	0	0	1	Baoshan in Shanghai	79	4	5	11	3					2		1	1	1	1	2	1	1	1	1	2	2	4	1
200	200-A	male	63		2014.7.3/2018.10.25	0	0	0	0	0	0	1	Baoshan in Shanghai	63	3	2	11	3					2		1	2	1	2	2	1	1	2	2	2	1	4	1
201	201-A	female	40		2014.7.4/2018.10.25	0	0	0	0	0	0	1	Baoshan in Shanghai	18	4	2	1	3					2		3	1	1	2	2	1	2,5	1	2	1	2	2	1
202	202-A	female	66		2014.7.4/2018.10.25	0	0	0	0	0	0	1	Baoshan in Shanghai	66	3	2	11	3					2		1	2	1	1	2	1	1	2	3	1	2	3	1
203	203-A	female	64		2014.7.4/2018.10.25	0	0	0	0	0	0	1	Baoshan in Shanghai	64	2	2	11	3					2		1	2	1	2	2	1	1	3	2	2	2	4	1
204	204-A	female	57		2014.7.4/2018.10.25	0	0	0	0	0	0	1	Baoshan in Shanghai	57	2	2	11	3					2		1	3	1	1	2	1	1	2	1	1	2	4	1
204	204-B	male	61		2014.7.4/2018.10.25	0	0	0	0	0	0	1	Baoshan in Shanghai	61	3	2	11	3					2		1	3	1	1	2	1	1	2	2	1	2	4	1
205	205-A	female	68		2014.7.4/2018.10.25	0	0	0	0	0	0	1	Baoshan in Shanghai	68	2	2	11	3					2		1	2	1	2	2	1	1	2	2	1	2	4	1
206	206-A	female	74		2014.7.4/2018.10.25	0	0	0	0	0	0	1	Baoshan in Shanghai	74	4	2	11	3					2		1	2	1	1	2	2	1	1	2	2	2	4	1
206	206-B	male	77		2014.7.4/2018.10.25	7	2	5	4	4	10	1	Baoshan in Shanghai	77	3	2	11	3					2		1	3	1	2	2\1	1	1	3\2	2\1	2\1	2	4	1
207	207-A	female	43		2014.7.4/2018.10.25	0	0	0	0	0	0	1	Baoshan in Shanghai	20	4	2	12	3					2		3	2	1	2	2	1	1	2	2	1	2	4	1
207	207-B	male	74		2014.7.4/2018.10.25	0	0	0	0	0	0	1	Baoshan in Shanghai	8	1	2	11	1	24	50	7	10	2		1	1	2	1	2	1	2	2	1	1	2	4	1
208	208-A	female	61		2014.7.4/2018.10.25	0	0	0	0	0	0	1	Baoshan in Shanghai	61	3	2	1	3					2		1	3	1	2	2	1	2	1	2	1	3	3	1
209	209-A	male	60		2014.7.4/2018.10.25	0	0	0	0	0	0	1	Baoshan in Shanghai	60	4	2	11	3					2		1	3	1	1	2	1	1	2	3	1	2	4	1
210	210-A	female	63		2014.7.4/2018.10.25	0	0	0	0	0	0	1	Baoshan in Shanghai	63	3	2	11	3					2		1	2	1	2	2	1	1	3	2	2	2	4	1
211	211-A	male	47		2014.7.4/2018.10.25	0	0	0	0	0	0	1	Baoshan in Shanghai	47	3	2	11	2					2		1	2	1	1	2	1	1	2	2	1	2	4	1
212	212-A	female	63		2014.7.4/2018.10.25	8	708	5	5	3	304	1	Baoshan in Shanghai	63	3	5	11	3					2		1	2	1	2	2	6	1	2	1	2	2	3	1
213	213-A	female	63		2014.7.4/2018.10.25	0	0	0	0	0	0	1	Baoshan in Shanghai	60	3	2	11	3					2		2,3	2	1	1	2	6	8	2	1	2	2	4	1
214	214-A	male	65		2014.7.4/2018.10.25	0	0	0	0	0	0	1	Baoshan in Shanghai	65	3	2	11	3					2		1	3	1	2	2	2	1	2	2	1	2	4	1
215	215-A	male	84		2014.7.4/2018.10.25	0	0	0	0	0	0	1	Baoshan in Shanghai	84	1	2	11	1	20	64	7	10	1	60	1	3	1	1	2	2	1	2	2	1	2	4	1
216	216-A	female	55		2014.7.4/2018.10.25	0	0	0	0	0	0	1	Baoshan in Shanghai	55	3	2	11	3					2		1	2	1	2	2	2	1	2	1	2	2	4	1
217	217-A	male	66		2014.7.4/2018.10.25	0	0	0	0	0	0	1	Baoshan in Shanghai	66	3	2	1	2	30	30	7	20	3		1	2	1	1	2	1	1	3	2	2	2	4	1
218	218-A	female	66		2014.7.4/2018.10.25	0	0	0	0	0	0	1	Baoshan in Shanghai	66	3	2	11	3					2		1	2	1	1	2	1	1	2	2	1	2	3	1
219	219-A	female	60		2014.7.4/2018.10.25	0	0	0	0	0	0	1	Baoshan in Shanghai	60	3	2	11	3					2		1	2	1	1	2	1	1	2	2	2	1	4	1
220	220-A	male	41	Lost to follow-up	2014.7.4/2018.10.25	0	0	0	0	0	0	1	Baoshan in Shanghai	41	5	2	1	3					1	10	1	1	1	2	2	1	2	2	2	1	2	3	1
220	220-B	female	40	Lost to follow-up	2014.7.4/2018.10.25	0	0	0	0	0	0	1	Baoshan in Shanghai	40	4	2	1	3					2		1	1	1	2	2	1	1	1	1	2	2	2	1
221	221-A	female	67		2014.7.4/2018.10.25	0	0	0	0	0	0	1	Baoshan in Shanghai	67	2	2	11	3					2		1	3	1	1	1	1	1	3	2	2	2	4	1
222	222-A	female	68		2014.7.4/2018.10.25	0	0	0	0	0	0	1	Baoshan in Shanghai	68	2	2	11	3					2		1	2	1	2	2	1	1	2	1	1	2	4	1
223	223-A	male	75		2014.7.4/2018.10.25	0	0	0	0	0	0	1	Baoshan in Shanghai	75	4	2	11	1	20	55	7	10	1	30	1	1	1	1	2	1	2	1	1	1	3	2	1
224	224-A	female	61		2014.7.4/2018.10.25	0	0	0	0	0	0	1	Baoshan in Shanghai	61	5	2	11	3					2		1,2,3	1	1	1	1	1	1	1	1	1	4	4	1
224	224-B	male	62		2014.7.4/2018.10.25	0	0	0	0	0	0	1	Baoshan in Shanghai	62	4	2	11	1	20	42	7	7	1	30	2,3,4	1	1	2	2	1	1	1	1	1	4	4	1
225	225-A	male	63		2014.7.4/2018.10.25	0	0	0	0	0	0	1	Baoshan in Shanghai	63	4	2	11	3					2		1	2	1	2	2	1	2	2	2	2	2	4	1
225	225-B	female	62		2014.7.4/2018.10.25	0	0	0	0	0	0	1	Baoshan in Shanghai	62	3	2	11	3					2		1	2	1	2	2	2	1	2	1	2	2	4	1
226	226-A	male	79		2014.7.4/2018.10.25	0	0	0	0	0	0	1	Baoshan in Shanghai	79	4	2	11	3					2		1	3	1	1	1	1	1	1	1	2	2	4	1
226	226-B	female	83		2014.7.4/2018.10.25	0	0	0	0	0	0	1	Baoshan in Shanghai	83	2	2	11	3					2		1	3	1	1	2	1	1	1	1	2	1	4	1
227	227-A	female	72		2014.7.4/2018.10.25	0	0	0	0	0	0	1	Baoshan in Shanghai	72	4	2	11	3					2		1	1	1	2	2	1	1	1	1	2	4	2	1
228	228-A	female	63		2014.7.4/2018.10.25	0	0	0	0	0	0	1	Baoshan in Shanghai	63	3	2	11	3					2		1,3	1	1	1	2	6	2,8	1	1	2	2	4	1
228	228-B	male	67		2014.7.4/2018.10.25	0	0	0	0	0	0	1	Baoshan in Shanghai	67	3	2	11	1	20	47	7	20	2		1	3	1	1	2	1	1	2	2	1	2	4	1
229	229-A	female	57		2014.7.4/2018.10.25	0	0	0	0	0	0	1	Baoshan in Shanghai	57	2	2	11	3					2		1	2	1	1	2	1	1	2	2	1	2	4	1
229	229-B	male	56		2014.7.4/2018.10.25	0	0	0	0	0	0	1	Baoshan in Shanghai	56	3	2	11	1	26	30	7	10	2		1	3	1	2	2	1	1	2	2	2	1	3	1
230	230-A	male	68		2014.7.4/2018.10.25	0	0	0	0	0	0	1	Baoshan in Shanghai	68	2	2	11	1	23	45	7	20	1	10	1,2,3	2	1	2	2	6	1	1	1	2	1	4	1
231	231-A	female	42		2014.7.4/2018.10.25	0	0	0	0	0	0	1	Baoshan in Shanghai	42	3	1	12	3					2		1	3	1	2	2	1	1	1	1	1	3	2	1
232	232-A	female	63		2014.7.4/2018.10.25	0	0	0	0	0	0	1	Baoshan in Shanghai	53	3	2	11	3					2		1	3	1	1	2	1	1	1	1	2	2	3	1
233	233-A	male	80		2014.7.4/2018.10.25	0	0	0	0	0	0	1	Baoshan in Shanghai	80	2	2	11	3					2		1	3	1	2	2	1	1	1	1	2	2	4	1
233	233-B	female	79		2014.7.4/2018.10.25	0	0	0	0	0	0	1	Baoshan in Shanghai	79	2	2	11	3					2		1	2	1	2	2	1	1	2	2	1	2	4	1
234	234-A	female	69		2014.7.4/2018.10.25	0	0	0	0	0	0	1	Baoshan in Shanghai	69	1	2	11	3					2		1	3	1	2	2	2	1	2	2	2	2	4	1
235	235-A	female	35		2014.7.4/2018.10.25	0	0	0	0	0	0	1	Baoshan in Shanghai	35	5	1	7	3					2		3	2	2	2	2	1	2	3	3	2	3	4	1
235	235-B	female	82		2014.7.4/2018.10.25	0	0	0	0	0	0	1	Baoshan in Shanghai	82	2	2	1	3					2		3	2	2	1	2	1	2	2	2	1	3	3	1
236	236-A	male	75		2014.7.4/2018.10.25	0	0	0	0	0	0	1	Baoshan in Shanghai	75	2	2	11	3					2		1	2	1	2	2	1	1	2	2	1	2	4	1
236	236-B	female	70		2014.7.4/2018.10.25	0	0	0	0	0	0	1	Baoshan in Shanghai	70	1	2	11	3					2		1	3	1	2	2	1	1	2	2	1	2	4	1
237	237-A	male	66		2014.7.4/2018.10.25	0	0	0	0	0	0	1	Baoshan in Shanghai	66	5	2	11	3					2		1	3	1	2	2	1	1	2	2	1	2	3	1
238	238-A	female	53		2014.7.4/2018.10.25	0	0	0	0	0	0	1	Baoshan in Shanghai	53	3	2	11	3					2		1	1	2	2	2	1	1	1	1	2	1	4	1
238	238-B	male	29		2014.7.4/2018.10.25	0	0	0	0	0	0	1	Baoshan in Shanghai	29	3	1	1	1	25	4	7	3	2		1	1	1	2	2	1	1	1	1	1	2	3	1
239	239-A	female	72		2014.7.4/2018.10.25	0	0	0	0	0	0	1	Baoshan in Shanghai	72	2	2	11	3					2		1	3	1	1	2	1	1	2	2	1	2	4	1
240	240-A	male	67		2014.7.4/2018.10.25	0	0	0	0	0	0	1	Baoshan in Shanghai	67	4	2	11	1	20	47	7	10	2		1	2	1	1	2	2	1	2	1	2	2	4	1
241	241-A	female	64		2014.7.4/2018.10.25	0	0	0	0	0	0	1	Baoshan in Shanghai	64	3	2	11	3					2		1	3	1	2	2	1	1	2	3	2	2	4	1
242	242-A	male	73		2014.7.4/2018.10.25	0	0	0	0	0	0	1	Baoshan in Shanghai	73	4	2	11	3					2		1	3	1	1	2	1	1	2	2	2	2	4	1
243	243-A	female	55	Lost to follow-up	2014.7.4/2018.10.25	0	0	0	0	0	0	1	Baoshan in Shanghai	30	4	2	11	3					2		1	1	1	1	2	1,3	1	2	3	2	4	1	1
244	244-A	female	58		2014.7.4/2018.10.25	0	0	0	0	0	0	1	Baoshan in Shanghai	58	3	2	11	3					2		1	2	1	2	2	1	1	2	1	2	2	4	1
245	245-A	male	82		2014.7.4/2018.10.25	0	0	0	0	0	0	1	Baoshan in Shanghai	82	5	2	11	3					2		1	2	1	1	1	2	1	2	2	1	2	4	1
245	245-B	female	73		2014.7.4/2018.10.25	0	0	0	0	0	0	1	Baoshan in Shanghai	73	3	2	11	3					2		1	2	1	1	1	2	1	2	2	1	3	2	1
246	246-A	female	61		2014.7.4/2018.10.25	0	0	0	0	0	0	1	Baoshan in Shanghai	61	3	2	11	3					2		1	2	1	2	2	1	1	2	1	2	2	4	1
247	247-A	female	58		2014.7.4/2018.10.25	0	0	0	0	0	0	1	Baoshan in Shanghai	30	4	2	11	3					2		1	1	1	2	2	1	2	2	1	1	4	1	1
247	247-B	female	30		2014.7.4/2018.10.25	0	0	0	0	0	0	1	Baoshan in Shanghai	30	5	1	6	3					2		1	1	1	2	2	1	2	2	2	1	2	3	1
248	248-A	female	56		2014.7.7/2018.11.01	0	0	0	0	0	0	1	Baoshan in Shanghai	56	4	2	11	3					2		1	2	1	2	2	1	1	2	1	1	3	3	1
249	249-A	female	63		2014.7.7/2018.11.01	0	0	0	0	0	0	1	Baoshan in Shanghai	63	3	5	11	3					2		1	2	1	2	1	1	1	2	2	1	2	4	1
250	250-A	female	61		2014.7.7/2018.11.01	0	0	0	0	0	0	1	Baoshan in Shanghai	61	3	2	11	3					2		1	2	1	2	1	1	1	2	2	2	2	4	1
251	251-A	female	68		2014.7.7/2018.11.01	0	0	0	0	0	0	1	Baoshan in Shanghai	68	2	2	11	3					2		2	2	1	1	2	1	5	1	1	2	1	2	1
251	251-B	male	75	Lost to follow-up	2014.7.7/2018.11.01	0	0	0	0	0	0	1	Baoshan in Shanghai	50	5	2	11	2					1	50	1	1	1	2	2	1	2	3	1	1	4	2	1
252	252-A	male	66		2014.7.7/2018.11.01	0	0	0	0	0	0	1	Baoshan in Shanghai	66	4	2	11	2					2		2	3	1	1	1	2	5	1	1	2	4	4	1
252	252-B	female	64		2014.7.7/2018.11.01	0	0	0	0	0	0	1	Baoshan in Shanghai	64	3	2	11	3					2		1	2	1	2	2	1	1	1	1	2	3	4	1
253	253-A	female	55		2014.7.7/2018.11.01	0	0	0	0	0	0	1	Baoshan in Shanghai	55	4	2	11	3					2		1	3	1	1	1	6	2	2	1	1	4	1	1
254	254-A	male	78		2014.7.7/2018.11.01	0	0	0	0	0	0	1	Baoshan in Shanghai	78	5	2	11	3					2		1	1	1	1	2	1	1	1	1	2	4	1	1
255	255-A	female	65		2014.7.7/2018.11.01	0	0	0	0	0	0	1	Baoshan in Shanghai	65	3	2	11	3					2		2	2	1	1	1	1	2	1	1	1	4	1	1
255	255-B	male	66		2014.7.7/2018.11.01	2	2	4	4	10	10	1	Baoshan in Shanghai	66	3	2	11	3					1	40	2	2	1	2	2	1	1	1	1	2	1	1	1
256	256-A	male	81		2014.7.7/2018.11.01	0	0	0	0	0	0	1	Baoshan in Shanghai	81	2	2	11	3					2		1	1	1	1	2	6	1	1	1	2	4	2	1
256	256-B	female	78		2014.7.7/2018.11.01	0	0	0	0	0	0	1	Baoshan in Shanghai	78	5	2	11	3					2		1,3	1	1	1	2	1	1	3	1	2	4	2	1
257	257-A	male	71		2014.7.7/2018.11.01	0	0	0	0	0	0	1	Baoshan in Shanghai	71	2	2	11	3					1	40	1	2	1	1	1	1	1	1	1	1	3	2	1
257	257-B	female	68		2014.7.7/2018.11.01	0	0	0	0	0	0	1	Baoshan in Shanghai	68	1	2	11	3					2		1	2	1	1	2	1	2,3	1	1	1	4	2	1
258	258-A	female	56	Lost to follow-up	2014.7.7/2018.11.01	0	0	0	0	0	0	1	Baoshan in Shanghai	56	4	2	11	3					2		1	1	1	2	2	1	1	1	1	2	1	1	1
259	259-A	female	68		2014.7.7/2018.11.01	0	0	0	0	0	0	1	Baoshan in Shanghai	68	2	2	11	3					2		2	3	1	2	2	3	1	4	4	2	4	2	1
259	259-B	male	67		2014.7.7/2018.11.01	0	0	0	0	0	0	1	Baoshan in Shanghai	67	3	2	11	3					1	40	2	3	1	1	1	2	2	1	1	2	4	2	1
260	260-A	female	54		2014.7.7/2018.11.01	2	2	4	4	10	10	1	Baoshan in Shanghai	54	3	2	11	3					2		2,3	1	1	2	2	1	1	1	1	2	1	3	1
261	261-A	female	68		2014.7.7/2018.11.01	0	0	0	0	0	0	1	Baoshan in Shanghai	68	3	2	11	3					2		1	1	1	1	2	1	1	1	1	2	4	2	1
261	261-B	female	72		2014.7.7/2018.11.01	0	0	0	0	0	0	1	Baoshan in Shanghai	72	2	2	11	3					2		1	1	1	2	2	1	1	1	1	2	4	2	1
262	262-A	female	66		2014.7.7/2018.11.01	0	0	0	0	0	0	1	Baoshan in Shanghai	66	3	2	11	3					2		2	3	1	1	2	2	2	1	1	1	4	1	1
262	262-B	male	63		2014.7.7/2018.11.01	0	0	0	0	0	0	1	Baoshan in Shanghai	63	3	2	11	1	16	47	7	20	1	40	1	2	1	1	2	1	1	1	1	1	4	1	1
263	263-A	female	75		2014.7.7/2018.11.01	0	0	0	0	0	0	1	Baoshan in Shanghai	75	4	2	11	3					2		3	1	1	2	1	1	1	1	1	2	4	3	1
263	263-B	male	75		2014.7.7/2018.11.01	0	0	0	0	0	0	1	Baoshan in Shanghai	75	4	2	11	1	25	50	7	10	1	50	1	1	1	1	2	1	2	1	1	1	2	2	1
264	264-A	female	74		2014.7.7/2018.11.01	0	0	0	0	0	0	1	Baoshan in Shanghai	74	2	2	11	3					2		2	3	1	1	1	3	2	1	1	1	4	1	1
265	265-A	male	92		2014.7.7/2018.11.01	0	0	0	0	0	0	1	Baoshan in Shanghai	92	1	2	11	3					2		1,5	2	2	1	2	2	1	1	1	2	1	1	1
265	265-B	female	86		2014.7.7/2018.11.01	0	0	0	0	0	0	1	Baoshan in Shanghai	86	1	2	11	3					2		1,2,5	2	1	2	2	2	1	1	1	2	1	1	1
266	266-A	male	75		2014.7.7/2018.11.01	0	0	0	0	0	0	1	Baoshan in Shanghai	75	4	2	11	1	30	45	3	1	1	40	2	3	1	1	1	1	2	1	1	1	4	2	1
266	266-B	female	72		2014.7.7/2018.11.01	0	0	0	0	0	0	1	Baoshan in Shanghai	72	4	2	11	3					2		1	1	1	2	2	1	1	1	1	1	4	2	1
267	267-A	female	67	Lost to follow-up	2014.7.7/2018.11.01	0	0	0	0	0	0	1	Baoshan in Shanghai	67	2	2	11	3					2		2	2	1	1	2	3	2	1	1	1	4	1	1
267	267-B	male	67	Lost to follow-up	2014.7.7/2018.11.01	0	0	0	0	0	0	1	Baoshan in Shanghai	67	4	2	11	3					1	30	1	2	1	2	2	1	1	1	1	1	3	1	1
268	268-A	female	61		2014.7.7/2018.11.01	0	0	0	0	0	0	1	Baoshan in Shanghai	61	3	2	11	3					2		1,2	2	1	2	2	6	1	1	1	2	1	1	1
268	268-B	male	65		2014.7.7/2018.11.01	0	0	0	0	0	0	1	Baoshan in Shanghai	65	4	2	11	2					1	30	1	1	1	1	2	1	2	1	1	2	4	2	1
269	269-A	female	69		2014.7.7/2018.11.01	0	0	0	0	0	0	1	Baoshan in Shanghai	69	3	2	11	3					2		2	1	1	1	2	2	2	3	4	1	4	2	2
269	269-B	male	75		2014.7.7/2018.11.01	0	0	0	0	0	0	1	Baoshan in Shanghai	75	5	2	11	3					2		1	1	1	1	2	2,3	1	1	1	2	4	4	1
269	269-C	male	20		2014.7.7/2018.11.01	0	0	0	0	0	0	1	Baoshan in Shanghai	20	5	1	13	3					2		1	1	1	2	2	1	1	1	1	1	2	1	1
270	270-A	female	61		2014.7.7/2018.11.01	0	0	0	0	0	0	1	Baoshan in Shanghai	61	2	2	11	3					2		1,2,3,4	2	1	2	2	1	1	1	1	2	2	4	1
270	270-B	male	63		2014.7.7/2018.11.01	2	2	9	409	10	10	1	Baoshan in Shanghai	63	2	2	11	1	20	43	7	40	2		1	3	1	1	2\1	1	2	1	1	1	4	1	1
271	271-A	male	77		2014.7.7/2018.11.01	0	0	0	0	0	0	1	Baoshan in Shanghai	77	2	2	11	1	47	30	7	5	2		1,3	2	1	2	2	2	1	1	1	2	1	2	1
271	271-B	female	76		2014.7.7/2018.11.01	0	0	0	0	0	0	1	Baoshan in Shanghai	76	4	2	11	3					2		1,2,3	2	1	1	2	1	1	1	1	2	1	2	1
272	272-A	female	78		2014.7.7/2018.11.01	0	0	0	0	0	0	1	Baoshan in Shanghai	78	1	2	11	3					2		1	3	1	2	1	6	1	3	1	1	1	1	1
272	272-B	male	79		2014.7.7/2018.11.01	0	0	0	0	0	0	1	Baoshan in Shanghai	79	3	2	11	1	20	59	7	10	1	50	1	1	1	2	2	1	1	1	1	1	4	1	1
273	273-A	female	76		2014.7.7/2018.11.01	0	0	0	0	0	0	1	Baoshan in Shanghai	76	1	2	11	3					2		1	2	1	1	2	6	1	1	1	2	1	1	1
273	273-B	male	77		2014.7.7/2018.11.01	0	0	0	0	0	0	1	Baoshan in Shanghai	77	4	2	11	1	26	51	7	10	2		1	3	1	1	2	2	1	1	1	1	1	1	1
274	274-A	male	85		2014.7.7/2018.11.01	0	0	0	0	0	0	1	Baoshan in Shanghai	85	3	5	11	3					2		1	1	1	1	1	2	1	3	1	2	1	1	1
275	275-A	female	72		2014.7.7/2018.11.01	0	0	0	0	0	0	1	Baoshan in Shanghai	72	4	2	11	3					2		1	1	1	1	2	1	2	1	1	1	4	2	1
276	276-A	male	84		2014.7.7/2018.11.01	0	0	0	0	0	0	1	Baoshan in Shanghai	84	3	2	11	2					2		1	1	1	1	2	1	1	1	1	2	4	1	1
276	276-B	female	61		2014.7.7/2018.11.01	0	0	0	0	0	0	1	Baoshan in Shanghai	61	4	1	11	3					2		1	2	1	1	2	1	2	1	1	2	4	4	1
277	277-A	female	54		2014.7.7/2018.11.01	0	0	0	0	0	0	1	Baoshan in Shanghai	54	3	2	11	3					2		1	1	1	2	2	1	1	1	2	1	4	1	1
278	278-A	male	67		2014.7.7/2018.11.01	0	0	0	0	0	0	1	Baoshan in Shanghai	67	3	2	11	1	20	47	7	30	1	40	2	3	1	2	1	3	1	1	1	1	4	2	1
278	278-B	female	62		2014.7.7/2018.11.01	0	0	0	0	0	0	1	Baoshan in Shanghai	62	3	2	11	3					2		2	1	1	2	2	1	1	1	1	1	4	2	1
279	279-A	female	80		2014.7.7/2018.11.01	708	708	205	205	104	20304	1	Baoshan in Shanghai	80	2	2	11	3					2		2	1	1	2	2	1	1	3	2	1	4	1	1
280	280-A	male	62		2014.7.7/2018.11.01	0	0	0	0	0	0	1	Baoshan in Shanghai	62	3	2	11	2					1	50	1,2,3	3	1	2	2	1	2,4	1	1	2	3	4	1
281	281-A	female	80		2014.7.7/2018.11.01	0	0	0	0	0	0	1	Baoshan in Shanghai	80	2	2	11	3					2		1	1	1	1	2	2	1	1	1	1	2	1	1
282	282-A	male	56		2014.7.7/2018.11.01	0	0	0	0	0	0	1	Baoshan in Shanghai	56	4	2	1	1	20	36	7	20	1	36	1	2	1	1	2	1	2	1	1	1	1	1	1
282	282-B	female	56		2014.7.7/2018.11.01	0	0	0	0	0	0	1	Baoshan in Shanghai	56	4	2	11	3					2		3	2	1	2	2	1	1	2	1	2	2	4	1
283	283-A	female	74		2014.7.7/2018.11.01	0	0	0	0	0	0	1	Baoshan in Shanghai	74	4	5	11	3					2		1	1	1	2	2	1	1	1	1	2	3	1	1
284	284-A	female	80		2014.7.7/2018.11.01	2	7	5	5	4	4	1	Baoshan in Shanghai	80	1	5	11	3					2		1	1	1	1	2	3,6	2	1	1	2	4	1	1
285	285-A	female	38		2014.7.7/2018.11.01	0	0	0	0	0	0	1	Baoshan in Shanghai	38	2	2	11	3					2		1	1	1	2	2	1	1	1	1	1	4	1	1
285	285-B	male	47		2014.7.7/2018.11.01	2	0	4	0	10	0	1	Baoshan in Shanghai	47	3\3	2\2	1\1	3\3					1	33\37	2,3,4\2,3,4	3\3	1\1	1\1	2\1	6\1	1\1	1\1	1\1	2\2	1\2	4\4	1\1
286	286-A	female	65		2014.7.7/2018.11.01	0	0	0	0	0	0	1	Baoshan in Shanghai	65	3	2	11	3					2		1,2,3	1	1	1	2	1	2	1	1	2	4	1	1
286	286-B	male	70		2014.7.7/2018.11.01	0	0	0	0	0	0	1	Baoshan in Shanghai	70	5	2	11	3					2		1	1	1	2	1	1	1	1	1	1	4	1	1
287	287-A	female	74		2014.7.7/2018.11.01	0	0	0	0	0	0	1	Baoshan in Shanghai	74	2	2	11	3					2		1	2	1	1	2	6	2	1	1	1	4	1	1
287	287-B	male	75		2014.7.7/2018.11.01	0	0	0	0	0	0	1	Baoshan in Shanghai	75	2	2	11	1	20	55	7	20	1	30	1	2	1	1	2	3	1	1	1	1	2	1	1
288	288-A	female	65		2014.7.7/2018.11.01	0	0	0	0	0	0	1	Baoshan in Shanghai	65	2	2	11	3					2		1,2,3,4	2	1	1	1	1	5	1	1	2	2	4	1
288	288-B	male	71		2014.7.7/2018.11.01	0	0	0	0	0	0	1	Baoshan in Shanghai	71	2	2	11	1	41	30	7	20	2		1	2	1	1	2	3	5	1	1	2	1	4	1
289	289-A	female	80		2014.7.7/2018.11.01	0	0	0	0	0	0	1	Baoshan in Shanghai	80	1	2	11	3					2		1	2	1	1	2	3	1	3	1	1	4	1	1
290	290-A	female	76		2014.7.7/2018.11.01	0	0	0	0	0	0	1	Baoshan in Shanghai	76	1	2	11	3					2		1	1	1	1	1	2	2,5	2	1	1	4	1	1
290	290-B	male	78		2014.7.7/2018.11.01	0	0	0	0	0	0	1	Baoshan in Shanghai	60	3	2	11	1	20	58	7	10	2		1	3	1	2	2	1	2,5	1	1	1	4	1	1
291	291-A	male	79		2014.7.7/2018.11.01	2	708	5	5	4	304	1	Baoshan in Shanghai	60	3	2	11	2					2		1	1	1	1	2	1	1	1	1	2	4	4	1
291	291-B	female	77		2014.7.7/2018.11.01	0	0	0	0	0	0	1	Baoshan in Shanghai	77	2	2	11	3					2		1	1	1	1	2	1	1	1	1	2	1	4	1
292	292-A	female	76		2014.7.7/2018.11.01	0	0	0	0	0	0	1	Baoshan in Shanghai	76	1	2	11	3					2		1	2	1	1	1	2	1	1	1	2	1	3	1
292	292-B	male	75		2014.7.7/2018.11.01	0	0	0	0	0	0	1	Baoshan in Shanghai	75	3	2	11	3					2		1	2	1	1	2	2	1	1	1	2	1	3	1
293	293-A	female	75		2014.7.7/2018.11.01	0	0	0	0	0	0	1	Baoshan in Shanghai	75	1	2	11	3					2		1	2	1	2	2	1	1	1	1	1	4	1	1
293	293-B	male	79		2014.7.7/2018.11.01	0	0	0	0	0	0	1	Baoshan in Shanghai	79	1	2	11	3					2		1	1	1	2	2	1	1	1	1	1	4	1	1
293	293-C	female	52		2014.7.7/2018.11.01	0	0	0	0	0	0	1	Baoshan in Shanghai	52	3	2	11	3					2		2,4	3	1	2	2	1	1	3	1	1	3	1	1
294	294-A	female	81	Lost to follow-up	2014.7.7/2018.11.01	0	0	0	0	0	0	1	Baoshan in Shanghai	81	3	2	11	3					2		1	1	1	1	2	3	1	3	1	2	1	2	2
295	295-A	female	63		2014.7.7/2018.11.01	0	0	0	0	0	0	1	Baoshan in Shanghai	63	3	2	11	3					2		1	1	1	2	1	1	2,5	1	1	1	4	2	1
295	295-B	male	64		2014.7.7/2018.11.01	0	0	0	0	0	0	1	Baoshan in Shanghai	40	5	2	11	3					2		1	1	1	1	2	1	2	1	1	1	2	2	1
296	296-A	female	66		2014.7.7/2018.11.01	0	0	0	0	0	0	1	Baoshan in Shanghai	40	4	2	11	3					2		1	3	1	2	2	1	1	1	1	1	4	1	1
296	296-B	male	42		2014.7.7/2018.11.01	0	0	0	0	0	0	1	Baoshan in Shanghai	42	5	2	1	3					2		1	1	1	1	2	1	2	3	2	1	2	1	1
297	297-A	female	60		2014.7.7/2018.11.01	0	0	0	0	0	0	1	Baoshan in Shanghai	60	2	2	11	3					2		1	2	1	2	2	1	2	1	1	2	3	4	1
297	297-B	male	60		2014.7.7/2018.11.01	0	0	0	0	0	0	1	Baoshan in Shanghai	40	3	2	11	1	20	40	7	10	2		2,3	1	1	1	2	5,6	2	1	1	1	2	1	1
298	298-A	female	65		2014.7.7/2018.11.01	0	0	0	0	0	0	1	Baoshan in Shanghai	65	2	2	11	3					2		2	2	1	2	2	3	1	1	2	1	4	1	1
298	298-B	male	69		2014.7.7/2018.11.01	0	0	0	0	0	0	1	Baoshan in Shanghai	69	3	2	11	1	35	34	7	40	1	30	2	2	1	1	2	3	2	1	1	1	4	1	1
299	299-A	female	69		2014.7.7/2018.11.01	0	0	0	0	0	0	1	Baoshan in Shanghai	69	3	2	11	3					2		1	1	1	2	2	6	1	1	1	2	1	4	1
299	299-B	male	71		2014.7.7/2018.11.01	0	0	0	0	0	0	1	Baoshan in Shanghai	71	3	2	11	1	23	48	7	16	2		1	1	1	1	2	1	1	1	1	2	4	4	1
300	300-A	female	57	Lost to follow-up	2014.7.7/2018.11.01	0	0	0	0	0	0	1	Baoshan in Shanghai	40	3	2	11	3					2		1	1	1	2	2	1	5	3	1	1	4	2	1
300	300-B	male	58		2014.7.7/2018.11.01	0	0	0	0	0	0	1	Baoshan in Shanghai	58	3	2	11	3					2		1	2	1	2	2	1	4	1	1	2	1	2	1
301	301-A	female	66		2014.7.7/2018.11.01	0	0	0	0	0	0	1	Baoshan in Shanghai	66	3	2	11	3					2		1	1	1	2	2	1	2	3	1	1	4	1	1
301	301-B	male	69		2014.7.7/2018.11.01	0	0	0	0	0	0	1	Baoshan in Shanghai	69	4	2	11	3					2		1	1	1	1	2	1	1	1	1	1	4	1	1
302	302-A	female	81		2014.7.7/2018.11.01	0	0	0	0	0	0	1	Baoshan in Shanghai	30	1	2	11	3					2		1	1	1	1	2	1	1	1	1	2	1	1	1
303	303-A	male	80		2014.7.7/2018.11.01	0	0	0	0	0	0	1	Baoshan in Shanghai	80	3	2	11	1	30	50	7	8	1	50	1	1	1	1	2	2	1	1	1	2	1	2	1
303	303-B	female	79		2014.7.7/2018.11.01	0	0	0	0	0	0	1	Baoshan in Shanghai	79	1	2	11	3					2		1	1	1	1	2	2,6	2	1	1	2	1	2	1
304	304-A	male	70		2014.7.7/2018.11.01	2	7	5	5	4	4	1	Baoshan in Shanghai	70	3	2	11	1	20	50	7	10	1	50	2,5	1	1	2	2	6	1	1	1	1	4	1	1
304	304-B	female	69		2014.7.7/2018.11.01	0	0	0	0	0	0	1	Baoshan in Shanghai	69	3	2	11	3					2		2,5	1	1	1	2	6	2	1	1	1	4	1	1
305	305-A	female	61		2014.7.7/2018.11.01	0	0	0	0	0	0	1	Baoshan in Shanghai	61	3	2	11	3					2		5	1	1	1	2	5	1	1	1	2	4	1	1
305	305-B	male	64		2014.7.7/2018.11.01	0	0	0	0	0	0	1	Baoshan in Shanghai	10	3	2	11	1	24	40	7	10	1	40	1	3	1	1	2	1	1	1	1	2	1	1	1
306	306-A	male	64		2014.7.7/2018.11.01	0	0	0	0	0	0	1	Baoshan in Shanghai	64	3	2	11	3					1	25	1	2	1	1	1	1	2,5	1	1	1	4	1	1
306	306-B	female	64		2014.7.7/2018.11.01	0	0	0	0	0	0	1	Baoshan in Shanghai	64	3	2	11	3					2		1	2	1	1	2	1	1	1	1	1	4	1	1
306	306-C	male	36	Lost to follow-up	2014.7.7/2018.11.01	0	0	0	0	0	0	1	Baoshan in Shanghai	36	5	2	1	3					2		1	1	1	2	2	1	2	1	1	1	2	1	1
307	307-A	female	71		2014.7.7/2018.11.01	0	0	0	0	0	0	1	Baoshan in Shanghai	71	2	2	11	3					2		1	1	1	1	2	1	1	1	1	2	1	2	1
307	307-B	male	71		2014.7.7/2018.11.01	0	0	0	0	0	0	1	Baoshan in Shanghai	55	4	2	11	1	20	51	7	20	1	51	1	3	1	2	2	1	1	1	1	1	4	3	1
308	308-A	female	65		2014.7.7/2018.11.01	0	0	0	0	0	0	1	Baoshan in Shanghai	65	3	2	11	3					2		1	1	1	2	2	1	2	1	1	2	1	4	1
309	309-A	female	68		2014.7.7/2018.11.01	0	0	0	0	0	0	1	Baoshan in Shanghai	68	5	2	11	3					2		1	2	1	1	2	1	2	3	1	2	1	1	1
309	309-B	male	70		2014.7.7/2018.11.01	0	0	0	0	0	0	1	Baoshan in Shanghai	70	3	2	11	2					2		1	3	1	2	2	1	2,5	1	1	2	1	1	1
310	310-A	female	77		2014.7.7/2018.11.01	0	0	0	0	0	0	1	Baoshan in Shanghai	77	1	2	11	3					2		1	1	1	2	1	1	2,5	1	1	1	4	1	1
311	311-A	female	73		2014.7.7/2018.11.01	0	0	0	0	0	0	1	Baoshan in Shanghai	73	1	2	11	3					2		1	2	1	1	2	1	2	1	1	1	4	1	1
311	311-B	male	74		2014.7.7/2018.11.01	0	0	0	0	0	0	1	Baoshan in Shanghai	74	2	2	11	3					1	10	1	2	1	2	2	1	1	3	1	1	1	2	1
312	312-A	female	72		2014.7.7/2018.11.01	0	0	0	0	0	0	1	Baoshan in Shanghai	72	1	2	11	3					2		1	2	1	2	2	3	1	1	1	2	1	1	1
313	313-A	female	75		2014.7.7/2018.11.01	0	0	0	0	0	0	1	Baoshan in Shanghai	75	2	2	11	3					2		1	2	2	2	2	1	1	3	1	1	4	1	1
314	314-A	female	65		2014.7.7/2018.11.01	0	0	0	0	0	0	1	Baoshan in Shanghai	65	2	2	11	3					2		1,2,3,4	1	1	1	1	1	2	1	1	2	1	1	1
314	314-B	female	67		2014.7.7/2018.11.01	0	0	0	0	0	0	1	Baoshan in Shanghai	67	5	2	11	3					2		1	1	1	1	2	2	1	4	1	1	4	1	1
315	315-A	female	76		2014.7.7/2018.11.01	0	0	0	0	0	0	1	Baoshan in Shanghai	76	1	2	11	3					2		1	2	1	2	2	1	5	1	1	1	4	1	1
315	315-B	male	76		2014.7.7/2018.11.01	0	0	0	0	0	0	1	Baoshan in Shanghai	76	2	2	11	1	20	56	7	10	2		2,3	2	1	1	1	3	1	1	1	2	1	1	1
316	316-A	female	64		2014.7.7/2018.11.01	0	0	0	0	0	0	1	Baoshan in Shanghai	64	3	2	11	3					2		1	2	1	1	2	1	1	1	1	2	1	4	1
317	317-A	female	67		2014.7.7/2018.11.01	0	0	0	0	0	0	1	Baoshan in Shanghai	67	3	2	11	3					2		1	1	1	1	2	2	1	1	1	2	1	3	1
318	318-A	male	87	Lost to follow-up	2014.7.7/2018.11.01	0	0	0	0	0	0	1	Baoshan in Shanghai	87	4	2	11	3					2		1	2	1	1	2	2	1	1	1	1	4	1	1
318	318-B	female	76		2014.7.7/2018.11.01	7	7	5	5	4	4	1	Baoshan in Shanghai	76	2	2	11	3					2		1	2	1	2	2	1	1	1	1	1	4	1	1
319	319-A	female	67		2014.7.7/2018.11.01	0	0	0	0	0	0	1	Baoshan in Shanghai	67	4	2	11	3					2		1	2	1	2	2	1	1	1	1	2	1	4	1
319	319-B	male	67		2014.7.7/2018.11.01	0	0	0	0	0	0	1	Baoshan in Shanghai	67	5	2	11	1	30	37	7	20	3		1	2	1	2	2	1	1	1	1	1	4	1	1
320	320-A	female	64		2014.7.7/2018.11.01	0	0	0	0	0	0	1	Baoshan in Shanghai	64	2	2	11	3					2		1	3	1	1	1	1	1	1	1	2	1	4	1
320	320-B	male	70		2014.7.7/2018.11.01	0	0	0	0	0	0	1	Baoshan in Shanghai	70	3	2	11	1	26	44	7	10	2		1	3	1	1	2	6	1	1	1	2	1	4	1
321	321-A	male	77		2014.7.7/2018.11.01	0	0	0	0	0	0	1	Baoshan in Shanghai	77	2	2	11	1	30	44	1	10	2		2	3	1	2	1	1	1	1	1	1	1	2	1
321	321-B	female	74		2014.7.7/2018.11.01	0	0	0	0	0	0	1	Baoshan in Shanghai	74	2	2	11	3					2		2	2	1	2	2	2	1	1	1	1	3	2	1
322	322-A	male	46	Lost to follow-up	2014.7.7/2018.11.01	0	0	0	0	0	0	1	Baoshan in Shanghai	46	4	2	9	3					2		1	3	1	2	2	6	1	3	4	3	2	4	1
323	323-A	female	64		2014.7.7/2018.11.01	0	0	0	0	0	0	1	Baoshan in Shanghai	64	2	2	11	3					2		1	2	1	1	2	1	2	1	1	1	4	2	1
324	324-A	female	78		2014.7.7/2018.11.01	0	0	0	0	0	0	1	Baoshan in Shanghai	78	1	2	11	3					2		1	1	1	2	2	1	1	1	1	1	1	1	1
325	325-A	female	67		2014.7.7/2018.11.01	0	0	0	0	0	0	1	Baoshan in Shanghai	67	2	2	11	3					2		1	1	1	1	2	1	1	1	1	2	1	1	1
325	325-B	male	66		2014.7.7/2018.11.01	0	0	0	0	0	0	1	Baoshan in Shanghai	66	4	2	11	2					1	40	1	2	1	1	2	1	1	1	1	2	4	1	1
326	326-A	female	79		2014.7.7/2018.11.01	0	0	0	0	0	0	1	Baoshan in Shanghai	79	1	5	11	2					2		1	1	1	1	2	1	1	1	1	2	4	1	1
327	327-A	female	70		2014.7.7/2018.11.01	0	0	0	0	0	0	1	Baoshan in Shanghai	70	2	2	11	3					2		2	2	1	1	2	2	2	3	1	1	4	1	1
328	328-A	female	68		2014.7.7/2018.11.01	0	0	0	0	0	0	1	Baoshan in Shanghai	68	3	2	11	3					2		1	1	1	2	2	1	1	1	1	2	4	4	1
329	329-A	male	87		2014.7.7/2018.11.01	0	0	0	0	0	0	1	Baoshan in Shanghai	87	2	5	11	3					2		1	1	1	2	1	1	2	1	1	1	4	1	2
330	330-A	female	76		2014.7.7/2018.11.01	0	0	0	0	0	0	1	Baoshan in Shanghai	76	1	2	11	3					2		1	1	1	1	1	3	1	1	1	2	1	2	1
331	331-A	female	58		2014.7.7/2018.11.01	0	0	0	0	0	0	1	Baoshan in Shanghai	58	3	2	11	3					2		1	2	1	1	1	1	5	1	1	1	4	1	1
332	332-A	female	66		2014.7.7/2018.11.01	0	0	0	0	0	0	1	Baoshan in Shanghai	66	3	2	11	3					2		1	2	1	1	1	1	2	1	1	1	4	1	1
332	332-B	male	66		2014.7.7/2018.11.01	0	0	0	0	0	0	1	Baoshan in Shanghai	66	4	2	11	1	20	46	7	5	1	46	2,5	1	1	1	1	1	2,5	1	1	1	4	1	1
333	333-A	female	86		2014.7.7/2018.11.01	0	0	0	0	0	0	1	Baoshan in Shanghai	86	3	2	11	3					2		2	2	1	1	1	3	1	1	1	2	1	2	1
334	334-A	male	88		2014.7.7/2018.11.01	0	0	0	0	0	0	1	Baoshan in Shanghai	88	3	2	11	3					2		1	2	1	1	2	1	1	1	1	1	1	2	1
334	334-B	female	85		2014.7.7/2018.11.01	0	0	0	0	0	0	1	Baoshan in Shanghai	85	1	2	11	3					2		1	2	1	1	2	6	1	1	1	1	1	2	1
335	335-A	female	54	Lost to follow-up	2014.7.7/2018.11.01	0	0	0	0	0	0	1	Baoshan in Shanghai	54	4	2	9	3					2		1	1	1	2	2	1	1	1	1	2	2	2	1
336	336-A	female	68		2014.7.7/2018.11.01	7	7	5	5	4	4	1	Baoshan in Shanghai	68	2	2	11	3					2		1	2	1	2	2	1	1	1	1	2	4	1	1
337	337-A	male	66		2014.7.7/2018.11.01	0	0	0	0	0	0	1	Baoshan in Shanghai	66	3	2	11	3					1	20	1	1	1	2	2	1	2	1	1	1	4	1	1
337	337-B	female	67		2014.7.7/2018.11.01	0	0	0	0	0	0	1	Baoshan in Shanghai	67	3	2	11	3					2		1	2	1	2	2	5,6	2	1	1	1	4	2	1
338	338-A	male	51		2014.7.7/2018.11.01	2	2	4	4	10	10	1	Baoshan in Shanghai	51	4	2	9	1	17	34	7	20	2		2	1	1	2	2	1	1	1	1	2	2	4	1
339	339-A	female	68		2014.7.7/2018.11.01	0	0	0	0	0	0	1	Baoshan in Shanghai	68	3	2	11	3					2		1	1	1	2	2	1	2	1	1	1	4	1	1
340	340-A	female	42	Lost to follow-up	2014.7.7/2018.11.01	0	0	0	0	0	0	1	Baoshan in Shanghai	42	4	2	9	1	30	12	7	10	1	12	5	3	1	2	2	1	1	2	2	1	2	2	2
341	341-A	female	60		2014.7.7/2018.11.01	0	0	0	0	0	0	1	Baoshan in Shanghai	60	3	2	11	3					2		1	2	1	2	1	1	1	1	1	1	4	1	1
342	342-A	female	46		2014.7.7/2018.11.01	0	0	0	0	0	0	1	Baoshan in Shanghai	46	4	2	9	3					2		3,5	2	1	2	2	1	2	1	4	1	4	2	1
343	343-A	female	40		2014.7.7/2018.11.01	0	0	0	0	0	0	1	Baoshan in Shanghai	40	3	1	9	3					2		1	1	1	2	2	1	1	1	1	1	2	1	1
344	344-A	female	63		2014.7.7/2018.11.01	8	8	5	5	3	3	1	Baoshan in Shanghai	63	2	2	11	3					2		1	1	1	1	1	1	1	1	1	1	4	1	1
344	344-B	male	67		2014.7.7/2018.11.01	0	0	0	0	0	0	1	Baoshan in Shanghai	67	2	2	11	3					2		2	3	1	1	1	1	1	1	1	1	1	1	1
345	345-A	female	77		2014.7.7/2018.11.01	0	0	0	0	0	0	1	Baoshan in Shanghai	77	1	5	11	3					2		1	3	1	1	1	3	1	1	1	2	1	1	1
346	346-A	female	75		2014.7.8/2018.11.08	0	0	0	0	0	0	1	Baoshan in Shanghai	75	2	2	11	3					2		1	3	1	2	2	1	1	3	1	2	3	1	1
346	346-B	male	79		2014.7.8/2018.11.08	0	0	0	0	0	0	1	Baoshan in Shanghai	79	5	2	11	3					2		3	1	1	2	2	1	1	1	1	2	1	3	1
347	347-A	female	75		2014.7.8/2018.11.08	1	0	7	0	9	9	1	Baoshan in Shanghai	75	1	2	11	3					2		1	3	1	1	1	2	1	1	1	1	4	1	1
348	348-A	female	74	Lost to follow-up	2014.7.8/2018.11.08	8	8	5	5	3	3	1	Baoshan in Shanghai	74	3	5	11	3					2		2	1	1	1	2	1	2	4	1	2	1	1	2
349	349-A	female	69		2014.7.8/2018.11.08	0	0	0	0	0	0	1	Baoshan in Shanghai	69	1	2	11	3					2		1	3	1	1	1	2	2	1	1	1	4	1	1
350	350-A	female	78		2014.7.8/2018.11.08	0	0	0	0	0	0	1	Baoshan in Shanghai	78	2	2	11	3					2		1	2	1	1	2	2,6	2	1	1	2	1	1	1
350	350-B	male	78		2014.7.8/2018.11.08	0	0	0	0	0	0	1	Baoshan in Shanghai	78	4	2	11	3					2		1	1	1	1	2	3	1	1	1	1	4	1	1
351	351-A	female	78		2014.7.8/2018.11.08	0	0	0	0	0	0	1	Baoshan in Shanghai	78	1	5	11	3					2		3	1	1	2	2	2	1	1	1	2	1	1	1
352	352-A	female	72		2014.7.8/2018.11.08	0	0	0	0	0	0	1	Baoshan in Shanghai	72	3	2	11	3					2		1,3	1	1	2	2	1	1	1	1	2	3	2	1
352	352-B	male	72		2014.7.8/2018.11.08	0	0	0	0	0	0	1	Baoshan in Shanghai	72	2	2	11	1	20	52	7	7	1	50	1	2	1	1	2	6	2	1	1	2	1	2	1
353	353-A	female	62		2014.7.8/2018.11.08	0	0	0	0	0	0	1	Baoshan in Shanghai	62	2	2	11	3					2		1	1	1	2	2	1	2	1	1	1	4	1	1
354	354-A	female	53		2014.7.8/2018.11.08	0	0	0	0	0	0	1	Baoshan in Shanghai	53	4	2	11	3					2		1,3	2	1	2	2	1	1	1	1	2	4	2	1
355	355-A	female	76		2014.7.8/2018.11.08	7	7	5	5	4	4	1	Baoshan in Shanghai	76	1	2	11	3					2		1	1\3	1	1\2	2	2\2,5	1	1\4	2\4	1	4\3	1\3	1\2
356	356-A	female	82		2014.7.8/2018.11.08	0	0	0	0	0	0	1	Baoshan in Shanghai	82	1	5	11	3					2		1	3	1	1	2	1	1	1	1	2	1	1	1
357	357-A	female	79		2014.7.8/2018.11.08	7	7	5	5	2	2	1	Baoshan in Shanghai	79	4	5	11	3					2		1	1	1	2	1	3	1	1	1	2	1	1	1
358	358-A	male	78		2014.7.8/2018.11.08	1	0	4	0	9	0	1	Baoshan in Shanghai	78	2	2	11	3					2		1\5	1	1	2	2	1\4	2	1	1	1	1	2\3	1
359	359-A	female	58		2014.7.8/2018.11.08	0	0	0	0	0	0	1	Baoshan in Shanghai	58	3	2	11	3					2		1	1	1	2	2	1	1	1	1	2	3	3	1
359	359-B	male	62		2014.7.8/2018.11.08	0	0	0	0	0	0	1	Baoshan in Shanghai	62	3	2	11	3					2		3,4	1	2	2	2	1	1	1	1	2	3	4	1
360	360-A	male	76		2014.7.8/2018.11.08	0	0	0	0	0	0	1	Baoshan in Shanghai	76	2	2	11	1	18	58	7	20	3		2	2	1	2	2	1	1	1	1	2	1	2	1
360	360-B	female	74		2014.7.8/2018.11.08	0	0	0	0	0	0	1	Baoshan in Shanghai	74	1	2	11	3					2		1	1	1	1	2	1	1	1	1	2	1	2	1
361	361-A	male	71		2014.7.8/2018.11.08	0	0	0	0	0	0	1	Baoshan in Shanghai	71	5	2	11	1	30	41	7	10	2		2	1	1	1	2	1	1	1	1	1	1	4	1
361	361-B	female	70		2014.7.8/2018.11.08	0	0	0	0	0	0	1	Baoshan in Shanghai	70	2	2	11	3					2		2	2	1	1	1	3	2,5	1	1	1	1	4	1
362	362-A	female	73		2014.7.8/2018.11.08	0	0	0	0	0	0	1	Baoshan in Shanghai	73	4	2	11	3					2		1	1	1	2	2	1	1	1	1	1	4	4	1
363	363-A	female	76		2014.7.8/2018.11.08	0	0	0	0	0	0	1	Baoshan in Shanghai	76	3	5	11	3					2		1	1	1	1	2	1	1	1	1	2	1	1	1
364	364-A	female	63		2014.7.8/2018.11.08	0	0	0	0	0	0	1	Baoshan in Shanghai	63	2	2	11	3					2		2	1	1	1	2	2,3	2,3	1	1	1	4	1	1
364	364-B	male	68		2014.7.8/2018.11.08	0	0	0	0	0	0	1	Baoshan in Shanghai	68	4	2	11	1	20	48	7	20	1	50	1	2	1	2	2	1	1	1	1	1	4	1	1
365	365-A	male	88		2014.7.8/2018.11.08	0	0	0	0	0	0	1	Baoshan in Shanghai	88	2	2	11	3					2		1	2	1	1	1	2	1	1	1	2	1	1	1
365	365-B	female	88		2014.7.8/2018.11.08	0	0	0	0	0	0	1	Baoshan in Shanghai	88	2	2	11	3					2		1	2	1	1	1	3	1	1	1	2	1	1	1
366	366-A	male	84		2014.7.8/2018.11.08	0	0	0	0	0	0	1	Baoshan in Shanghai	84	1	5	11	3					1	30	1	1	1	2	2	1	1	1	1	1	4	2	1
367	367-A	female	56		2014.7.8/2018.11.08	0	0	0	0	0	0	1	Baoshan in Shanghai	56	2	2	11	3					2		1	1	1	2	2	1	1	1	1	2	2	2	1
367	367-B	male	56		2014.7.8/2018.11.08	0	0	0	0	0	0	1	Baoshan in Shanghai	56	2	2	11	1	20	36	7	20	2		2,3,4	3	1	1	2	1	2	1	1	1	2	1	1
368	368-A	male	72		2014.7.8/2018.11.08	0	0	0	0	0	0	1	Baoshan in Shanghai	72	4	2	11	1	20	52	7	10	2		2	2	1	2	2	1	1	1	1	1	4	1	1
368	368-B	female	66		2014.7.8/2018.11.08	0	0	0	0	0	0	1	Baoshan in Shanghai	66	2	2	11	3					2		2	1	1	2	2	3	1	1	1	1	4	1	1
369	369-A	female	65		2014.7.8/2018.11.08	0	0	0	0	0	0	1	Baoshan in Shanghai	65	2	2	11	3					2		1	2	1	1	2	1	2	2	1	2	4	2	1
369	369-B	male	73		2014.7.8/2018.11.08	0	0	0	0	0	0	1	Baoshan in Shanghai	73	3	2	11	3					1	20	1	2	1	1	2	1	1	1	1	2	2	2	1
370	370-A	female	65		2014.7.8/2018.11.08	0	0	0	0	0	0	1	Baoshan in Shanghai	65	2	2	11	3					2		1	1	1	2	2	2	1	3	1	1	4	1	1
370	370-B	male	67		2014.7.8/2018.11.08	0	0	0	0	0	0	1	Baoshan in Shanghai	67	3	2	11	1	27	40	7	20	1	10	2,3,4	3	1	2	2	1	2	1	1	1	1	1	1
371	371-A	male	88		2014.7.8/2018.11.08	0	0	0	0	0	0	1	Baoshan in Shanghai	88	5	2	11	3					2		1	2	1	2	2	2	1	1	1	2	1	1	1
371	371-B	female	86		2014.7.8/2018.11.08	0	0	0	0	0	0	1	Baoshan in Shanghai	86	3	2	11	3					2		1	1	1	1	1	3	1	1	1	2	1	1	1
372	372-A	female	82		2014.7.8/2018.11.08	0	0	0	0	0	0	1	Baoshan in Shanghai	60	3	2	11	3					2		2	3	1	1	2	2	2	1	1	1	1	1	1
373	373-A	female	69		2014.7.8/2018.11.08	0	0	0	0	0	0	1	Baoshan in Shanghai	69	3	2	11	3					2		1	1	1	1	2	1	2	1	1	2	3	2	1
373	373-B	male	65		2014.7.8/2018.11.08	0	0	0	0	0	0	1	Baoshan in Shanghai	65	4	2	11	3					2		2	2	1	2	1	2	4	1	1	2	3	2	1
374	374-A	male	80	Lost to follow-up	2014.7.8/2018.11.08	0	0	0	0	0	0	1	Baoshan in Shanghai	80	4	2	11	3					2		1	1	1	1	1	1	1	1	1	2	1	1	1
374	374-B	female	74	Lost to follow-up	2014.7.8/2018.11.08	0	0	0	0	0	0	1	Baoshan in Shanghai	74	5	2	11	3					2		1	1	1	1	2	2,3	2	1	1	2	1	1	1
375	375-A	female	73		2014.7.8/2018.11.08	0	0	0	0	0	0	1	Baoshan in Shanghai	73	4	2	11	3					2		1	1	1	1	2	1	2	1	1	1	4	1	1
376	376-A	female	68		2014.7.8/2018.11.08	0	0	0	0	0	0	1	Baoshan in Shanghai	68	2	2	11	3					2		1	1	1	2	2	1	1	1	1	2	1	4	1
376	376-B	male	70		2014.7.8/2018.11.08	0	0	0	0	0	0	1	Baoshan in Shanghai	70	3	2	11	1	60	10	7	10	2		1	1	1	2	2	1	1	1	1	2	1	1	1
377	377-A	female	68		2014.7.8/2018.11.08	0	0	0	0	0	0	1	Baoshan in Shanghai	68	3	2	11	3					2		1	1	1	1	2	1	2	1	1	1	4	1	1
378	378-A	female	83		2014.7.8/2018.11.08	0	0	0	0	0	0	1	Baoshan in Shanghai	83	1	5	11	3					2		1	3	1	2	1	1	1	1	1	1	1	1	1
379	379-A	female	68		2014.7.8/2018.11.08	0	0	0	0	0	0	1	Baoshan in Shanghai	68	3	2	11	3					2		1	1	1	1	1	2	1	1	1	2	1	1	1
380	380-A	male	73		2014.7.8/2018.11.08	0	0	0	0	0	0	1	Baoshan in Shanghai	73	3	2	11	2					1	30	1	2	1	2	1	1	1	1	1	1	4	1	1
381	381-A	female	57		2014.7.8/2018.11.08	0	0	0	0	0	0	1	Baoshan in Shanghai	57	2	2	11	3					2		1,2,3	1	1	2	2	1	1	1	1	2	1	1	1
381	381-B	female	80		2014.7.8/2018.11.08	0	0	0	0	0	0	1	Baoshan in Shanghai	80	1	2	11	3					2		1	2	1	1	1	1	2,5	1	1	2	1	1	1
382	382-A	female	69		2014.7.8/2018.11.08	1	1	3	5	8	8	1	Baoshan in Shanghai	69	3	2	11	3					2		1	1	1	2	2	1	1	1	1	1	4	1	1
383	383-A	male	85		2014.7.8/2018.11.08	0	0	0	0	0	0	1	Baoshan in Shanghai	85	2	5	11	3					2		1	2	1	1	2	1	1	1	1	2	1	2	1
384	384-A	female	60		2014.7.8/2018.11.08	0	0	0	0	0	0	1	Baoshan in Shanghai	60	3	2	11	3					2		1	1	1	1	2	1	2	1	1	2	1	1	1
385	385-A	female	68	Lost to follow-up	2014.7.8/2018.11.08	0	0	0	0	0	0	1	Baoshan in Shanghai	40	3	2	11	3					2		2,3	1	1	2	2	2	2	1	1	1	1	1	1
386	386-A	female	66		2014.7.8/2018.11.08	0	0	0	0	0	0	1	Baoshan in Shanghai	66	3	2	11	3					2		1	1	1	1	2	1	1	3	2	1	2	1	1
387	387-A	female	54		2014.7.8/2018.11.08	0	0	0	0	0	0	1	Baoshan in Shanghai	54	4	4	11	3					2		1	2	1	2	2	1	1	1	1	2	4	2	1
388	388-A	female	79		2014.7.8/2018.11.08	0	0	0	0	0	0	1	Baoshan in Shanghai	79	1	5	11	3					2		1	1	1	2	2	1	1	3	1	2	1	4	1
389	389-A	male	80		2014.7.8/2018.11.08	0	0	0	0	0	0	1	Baoshan in Shanghai	80	3	2	11	3					2		1	2	1	1	2	1	1	1	1	3	3	2	1
390	390-A	male	77		2014.7.8/2018.11.08	0	0	0	0	0	0	1	Baoshan in Shanghai	64	2	2	11	3					2		1	2	1	2	2	6	1	1	1	2	1	1	1
391	391-A	female	70		2014.7.8/2018.11.08	0	0	0	0	0	0	1	Baoshan in Shanghai	70	1	2	11	3					2		1	1	1	2	2	1	1	1	1	2	1	2	1
391	391-B	male	71		2014.7.8/2018.11.08	0	0	0	0	0	0	1	Baoshan in Shanghai	71	4	2	11	3					1	30	1,2,3	1	1	1	2	6	2	1	1	2	1	2	1
392	392-A	female	74		2014.7.8/2018.11.08	407	40708	205	205	104	104	1	Baoshan in Shanghai	74	2	2	11	3					2		1	1	1	2	1	1	1	1	1	1	4	1	1
393	393-A	male	84		2014.7.8/2018.11.08	0	0	0	0	0	0	1	Baoshan in Shanghai	84	2	5	11	3					2		1	2	1	2	2	6	1	1	2	2	1	2	1
394	394-A	female	63		2014.7.8/2018.11.08	0	0	0	0	0	0	1	Baoshan in Shanghai	63	3	2	11	3					2		1	1\2	1	1	2	1	1	1	1	2	4	4	1
395	395-A	male	59		2014.7.8/2018.11.08	0	0	0	0	0	0	1	Baoshan in Shanghai	59	5	2	9	3					2		2	1	1	1	2	1	7	1	1	2	3	3	1
396	396-A	male	51		2014.7.8/2018.11.08	0	0	0	0	0	0	1	Baoshan in Shanghai	51	4	2	11	2					2		1	1	1	1	1	1	2,5	1	1	2	1	1	1
396	396-B	female	49	Lost to follow-up	2014.7.8/2018.11.08	0	0	0	0	0	0	1	Baoshan in Shanghai	49	4	2	9	3					2		1	1	1	2	2	5	1	1	1	2	2	4	1
397	397-A	male	81		2014.7.8/2018.11.08	0	0	0	0	0	0	1	Baoshan in Shanghai	81	4	2	11	1	17	60	7	10	2		1	1	1	1	2\1	2	2	1\2	1	1	4\3	1\4	1
398	398-A	female	79		2014.7.8/2018.11.08	0	0	0	0	0	0	1	Baoshan in Shanghai	79	1	2	11	3					2		1	2	1	1	2	1	1	1	1	2	1	1	1
399	399-A	female	72		2014.7.8/2018.11.08	0	0	0	0	0	0	1	Baoshan in Shanghai	72	2	2	11	3					2		1	1	1	1	2	1	1	1	1	2	1	2	1
399	399-B	male	71		2014.7.8/2018.11.08	0	0	0	0	0	0	1	Baoshan in Shanghai	71	4	2	11	3					2		1	1	1	1	2	1	1	1	1	2	1	2	1
400	400-A	female	84		2014.7.8/2018.11.08	0	0	0	0	0	0	1	Baoshan in Shanghai	84	3	2	11	3					2		1	1	1	1	2	1	1	1	1	1	4	1	1
401	401-A	male	68		2014.7.8/2018.11.08	2	2	4	4	10	10	1	Baoshan in Shanghai	68	3	2	11	3\2					1	40\44	1	1	1	1	1	3\2,3	2,5\2,3,5	1	1	1\2	4	1\2	1
401	401-B	female	66		2014.7.8/2018.11.08	0	0	0	0	0	0	1	Baoshan in Shanghai	66	3	2	11	3					2		1	1	1	1	2	3	2	3	1	1	3	1	1
402	402-A	female	77		2014.7.8/2018.11.08	1	0	4	0	9	0	1	Baoshan in Shanghai	77	2	2	11	3					2		2	1	1	1	2	3	2	1	1	2	1	1	1
403	403-A	male	62		2014.7.8/2018.11.08	0	0	0	0	0	0	1	Baoshan in Shanghai	62	3	2	11	2					1	30	2	2	1	1	2	6\3	1	1	1	2	4	4	1
403	403-B	female	38	Lost to follow-up	2014.7.8/2018.11.08	0	0	0	0	0	0	1	Baoshan in Shanghai	14	1	2	9	3					2		1,2,4	1	1	2	2	1	1	1	1	2	2	4	1
404	404-A	female	75		2014.7.8/2018.11.08	0	0	0	0	0	0	1	Baoshan in Shanghai	75	4	2	11	3					2		1	1	1	2	2	6	2	1	1	1	4	2	1
405	405-A	female	77		2014.7.8/2018.11.08	0	0	0	0	0	0	1	Baoshan in Shanghai	77	2	5	11	3					2		1,2,3	1	1	2	2	1	1	1	1	2	1	2	1
406	406-A	female	82		2014.7.8/2018.11.08	0	0	0	0	0	0	1	Baoshan in Shanghai	82	2	2	11	3					2		1	2	2	2	2	1	1	3	3	1	4	2	1
407	407-A	female	51		2014.7.8/2018.11.08	0	0	0	0	0	0	1	Baoshan in Shanghai	51	3	2	11	3					2		1,3	2	1	1	2	1	2	2	2	1	1	1	1
408	408-A	female	57		2014.7.8/2018.11.08	0	0	0	0	0	0	1	Baoshan in Shanghai	57	4	2	9	3					2		1	1	1	2	2	1	1	3	1	1	3	2	2
409	409-A	female	64		2014.7.8/2018.11.08	0	0	0	0	0	0	1	Baoshan in Shanghai	64	4	2	11	3					2		1	1	1	2	1	6	2	1	1	1	4	1	1
409	409-B	female	37		2014.7.8/2018.11.08	0	0	0	0	0	0	1	Baoshan in Shanghai	37	4	2	1	3					2		1	1	1	2	2	2	1	1	1	1	4	1	1
410	410-A	male	70		2014.7.8/2018.11.08	0	0	0	0	0	0	1	Baoshan in Shanghai	70	2	2	11	1	20	50	7	10	2		2,4	1	1	1	2	1	2	1	1	1	4	1	1
411	411-A	male	67		2014.7.8/2018.11.08	0	0	0	0	0	0	1	Baoshan in Shanghai	67	2	2	11	1	20	40	7	10	2		1	2	1	1	2	1	2	1	1	1	2	1	1
411	411-B	female	64		2014.7.8/2018.11.08	0	0	0	0	0	0	1	Baoshan in Shanghai	64	3	2	11	3					2		1	2	1	2	2	1	2	3	1	1	2	1	1
412	412-A	female	80		2014.7.8/2018.11.08	0	0	0	0	0	0	1	Baoshan in Shanghai	80	1	5	11	3					2		2	1	1	2	2	6	2	1	1	1	1	2	1
413	413-A	female	35		2014.7.8/2018.11.08	0	0	0	0	0	0	1	Baoshan in Shanghai	35	5	1	9	3					2		1,3,4	2	1	2	2	1	2	1	2	1	4	1	1
414	414-A	female	68		2014.7.8/2018.11.08	0	0	0	0	0	0	1	Baoshan in Shanghai	68	4	2	11	3					2		1	1	1	2	2	1	1	1	1	1	4	1	1
415	415-A	female	68		2014.7.8/2018.11.08	0	0	0	0	0	0	1	Baoshan in Shanghai	68	2	2	11	3					2		1	1	1	2	2	1	2	1	1	1	4	1	1
415	415-B	male	74		2014.7.8/2018.11.08	0	0	0	0	0	0	1	Baoshan in Shanghai	74	5	2	11	2					2		1	2	1	1	2	6	1	1	1	1	4	1	1
416	416-A	female	62	Lost to follow-up	2014.7.8/2018.11.08	0	0	0	0	0	0	1	Baoshan in Shanghai	62	2	2	11	3					2		1	2	1	2	2	1	2	1	1	1	4	1	1
417	417-A	male	68		2014.7.8/2018.11.08	0	0	0	0	0	0	1	Baoshan in Shanghai	68	5	2	11	3					2		1	1	1	2	1	5	2	3	1	1	4	2	1
418	418-A	male	85		2014.7.8/2018.11.08	0	0	0	0	0	0	1	Baoshan in Shanghai	85	2	2	11	3					2		1	2	1	1	1	1	1	1	1	1	1	2	1
419	419-A	female	79		2014.7.8/2018.11.08	0	0	0	0	0	0	1	Baoshan in Shanghai	79	1	5	11	3					2		1	2	1	2	2	1	1	1	1	1	1	2	1
420	420-A	female	72		2014.7.9/2018.11.15	0	0	0	0	0	0	1	Baoshan in Shanghai	72	3	2	11	3					2		1	2	1	1	2	1	2	1	1	2	2	2	1
420	420-B	male	76		2014.7.9/2018.11.15	0	0	0	0	0	0	1	Baoshan in Shanghai	76	5	2	11	3					3		2	1	1	1	2	6	1	1	1	1	3	4	1
421	421-A	female	53		2014.7.9/2018.11.15	0	0	0	0	0	0	1	Baoshan in Shanghai	53	3	2	11	3					2		1	1	1	2	2	1	1	1	1	2	3	4	1
422	422-A	female	66		2014.7.9/2018.11.15	0	0	0	0	0	0	1	Baoshan in Shanghai	66	2	2	11	3					2		1	2	1	1	2	1	1	1	1	1	4	1	1
423	423-A	female	65		2014.7.9/2018.11.15	0	0	0	0	0	0	1	Baoshan in Shanghai	65	2	2	11	3					2		1	3	1	1	1	1	1	1	1	1	4	1	1
424	424-A	male	89		2014.7.9/2018.11.15	0	0	0	0	0	0	1	Baoshan in Shanghai	89	5	2	11	3					2		2	1	1	1	2	2	1	1	1	1	1	2	1
425	425-A	male	73		2014.7.9/2018.11.15	0	0	0	0	0	0	1	Baoshan in Shanghai	73	5	2	11	3					2		1	1	1	1	2	1	1	1	1	1	1	1	1
425	425-B	female	73		2014.7.9/2018.11.15	0	0	0	0	0	0	1	Baoshan in Shanghai	73	4	2	11	3					2		1	1	1	2	2	1	1	1	1	1	4	1	1
426	426-A	female	70		2014.7.9/2018.11.15	0	0	0	0	0	0	1	Baoshan in Shanghai	70	3	2	11	3					2		1	1	1	1	2	6	1	1	1	1	1	2	1
427	427-A	male	71		2014.7.9/2018.11.15	0	0	0	0	0	0	1	Baoshan in Shanghai	71	4	2	11	1	41	30	7	10	2		2	3	1	1	2	1	2	1	1	1	4	2	1
427	427-B	female	69		2014.7.9/2018.11.15	0	0	0	0	0	0	1	Baoshan in Shanghai	69	3	2	11	3					2		1	1	1	1	2	1	1	1	1	1	4	2	1
428	428-A	female	70		2014.7.9/2018.11.15	0	0	0	0	0	0	1	Baoshan in Shanghai	70	3	2	11	3					2		1	1	1	1	2	2	2	3	1	1	4	2	1
428	428-B	male	72		2014.7.9/2018.11.15	2	2	4	4	11	11	1	Baoshan in Shanghai	58	4	2	11	3					2		2,3,4	2	1	2	2	1	2	1	1	1	4	1	1
429	429-A	female	74		2014.7.9/2018.11.15	0	0	0	0	0	0	1	Baoshan in Shanghai	74	2	2	11	3					2		1	2	1	2	2	2	1	1	1	1	1	2	1
430	430-A	female	67		2014.7.9/2018.11.15	0	0	0	0	0	0	1	Baoshan in Shanghai	67	2	2	11	3					2		1	1	1	2	2	1	1	3	1	1	2	1	1
431	431-A	female	61		2014.7.9/2018.11.15	0	0	0	0	0	0	1	Baoshan in Shanghai	30	2	2	11	3					2		2	1	1	1	2	1	2	1	1	1	2	1	1
432	432-A	female	67		2014.7.9/2018.11.15	0	0	0	0	0	0	1	Baoshan in Shanghai	67	2	2	11	3					2		1	2	1	1	2	1	2	1	1	1	2	1	1
433	433-A	female	67		2014.7.9/2018.11.15	0	0	0	0	0	0	1	Baoshan in Shanghai	67	2	2	11	3					2		1	1	1	1	2	5	5	1	1	1	1	1	1
434	434-A	female	68		2014.7.9/2018.11.15	0	0	0	0	0	0	1	Baoshan in Shanghai	68	2	2	11	3					2		2	1	1	2	2	1	2	3	1	1	1	1	1
435	435-A	female	61		2014.7.9/2018.11.15	0	0	0	0	0	0	1	Baoshan in Shanghai	61	3	2	11	3					2		2	2	1	1	2	1	2	1	1	1	2	2	1
435	435-B	male	61		2014.7.9/2018.11.15	0	0	0	0	0	0	1	Baoshan in Shanghai	61	5	2	11	1	20	41	7	10	1	41	1	3	1	2	2	1	1	1	1	1	4	2	1
436	436-A	female	69		2014.7.9/2018.11.15	0	0	0	0	0	0	1	Baoshan in Shanghai	69	3	2	11	3					2		1	1	1	1	2	1	2	1	1	1	2	1	1
437	437-A	female	80		2014.7.9/2018.11.15	0	0	0	0	0	0	1	Baoshan in Shanghai	20	1	2	11	3					2		2	1	1	1	2	1	1	3	1	1	1	1	1
438	438-A	female	68	Lost to follow-up	2014.7.9/2018.11.15	0	0	0	0	0	0	1	Baoshan in Shanghai	30	3	2	11	3					2		5	1	1	2	2	1	1	1	1	1	4	1	1
439	439-A	female	60		2014.7.9/2018.11.15	0	0	0	0	0	0	1	Baoshan in Shanghai	30	3	2	11	3					2		1	3	1	1	1	1	2	1	1	1	4	1	1
440	440-A	female	75		2014.7.9/2018.11.15	0	0	0	0	0	0	1	Baoshan in Shanghai	75	4	2	11	3					2		1	1	1	1	2	1	2	1	1	1	4	2	1
440	440-B	male	75		2014.7.9/2018.11.15	0	0	0	0	0	0	1	Baoshan in Shanghai	75	4	2	11	3					2		1	2	1	2	2	1	1	1	1	1	4	1	1
440	440-C	male	45		2014.7.9/2018.11.15	0	0	0	0	0	0	1	Baoshan in Shanghai	45	4	2	1	3					2		1,4	3	1	2	2	2	2	1	1	1	3	1	1
440	440-D	female	40	Lost to follow-up	2014.7.9/2018.11.15	0	0	0	0	0	0	1	Baoshan in Shanghai	25	4	2	1	3					2		1	1	1	1	2	1	2	1	1	1	3	1	1
441	441-A	female	55		2014.7.9/2018.11.15	0	0	0	0	0	0	1	Baoshan in Shanghai	55	3	2	11	3					2		1	1	1	2	2	1	1	1	1	2	1	1	1
442	442-A	female	78		2014.7.9/2018.11.15	0	0	0	0	0	0	1	Baoshan in Shanghai	78	3	2	11	3					2		1	1	1	1	2	1	2	1	1	1	2	1	1
443	443-A	female	59		2014.7.9/2018.11.15	0	0	0	0	0	0	1	Baoshan in Shanghai	59	3	2	11	3					2		1	1	1	1	2	1	2	1	1	2	1	1	1
444	444-A	female	78		2014.7.9/2018.11.15	0	0	0	0	0	0	1	Baoshan in Shanghai	78	1	2	11	3					2		1	1	1	1	2	1	1	3	1	1	2	2	1
445	445-A	female	75		2014.7.9/2018.11.15	0	0	0	0	0	0	1	Baoshan in Shanghai	75	3	2	11	3					2		1	1	1	1	1	1	2,5	3	1	1	4	1	1
446	446-A	female	66		2014.7.9/2018.11.15	0	0	0	0	0	0	1	Baoshan in Shanghai	66	3	2	11	3					2		2,3	1	1	2	2	6	5	1	1	1	4	1	1
447	447-A	male	76		2014.7.9/2018.11.15	0	0	0	0	0	0	1	Baoshan in Shanghai	76	4	2	11	3					2		1	1	1	1	1	1	1	3	1	1	1	2	2
447	447-B	female	74		2014.7.9/2018.11.15	0	0	0	0	0	0	1	Baoshan in Shanghai	74	4	2	11	3					2		1	1	1	1	2	2,3	2	1	1	1	2	2	2
448	448-A	female	54		2014.7.9/2018.11.15	0	0	0	0	0	0	1	Baoshan in Shanghai	54	4	2	11	3					2		2,3,4	2	1	1	1	1	5	1	1	1	4	1	1
449	449-A	female	53		2014.7.9/2018.11.15	0	0	0	0	0	0	1	Baoshan in Shanghai	53	3	2	11	3					2		1	1	1	2	2	1	2	3	1	1	2	2	1
450	450-A	male	61		2014.7.9/2018.11.15	0	0	0	0	0	0	1	Baoshan in Shanghai	61	4	3	11	3					2		1	1	1	1	2	3	2,5	1	1	1	1	2	2
451	451-A	female	72		2014.7.9/2018.11.15	0	0	0	0	0	0	1	Baoshan in Shanghai	72	2	2	11	3					2		1	1	1	1	2	2	2	1	1	1	2	3	1
452	452-A	male	61		2014.7.9/2018.11.15	0	0	0	0	0	0	1	Baoshan in Shanghai	61	3	2	11	2					3		2	3	1	1	2	1	2	1	1	1	1	2	1
453	453-A	female	50		2014.7.9/2018.11.15	0	0	0	0	0	0	1	Baoshan in Shanghai	50	4	2	11	3					2		1,3	1	1	2	2	1	1	3	2	3	1	1	2
454	454-A	female	50		2014.7.9/2018.11.15	0	0	0	0	0	0	1	Baoshan in Shanghai	50	4	2	12	3					2		2,3,4	3	1	2	2	1	2	1	1	1	3	1	1
455	455-A	male	76		2014.7.9/2018.11.15	0	0	0	0	0	0	1	Baoshan in Shanghai	76	5	2	11	1	36	40	7	10	2		2,3	1	1	2	2	1	2	1	1	3	4	1	1
456	456-A	female	56		2014.7.10/2018.11.15	0	0	0	0	0	0	1	Baoshan in Shanghai	56	4	2	11	3					2		2,3	1	1	2	2	1	1	1	1	2	1	2	1
457	457-A	female	64		2014.7.10/2018.11.15	0	0	0	0	0	0	1	Baoshan in Shanghai	64	3	2	11	3					2		1,3	1	1	1	2	1	2	1	1	1	3	1	1
458	458-A	female	76		2014.7.10/2018.11.15	0	0	0	0	0	0	1	Baoshan in Shanghai	76	1	2	11	3					2		1	1	1	2	2	2	1	1	1	1	1	1	1
459	459-A	male	68		2014.7.10/2018.11.15	0	0	0	0	0	0	1	Baoshan in Shanghai	68	4	2	11	1	20	48	7	10	1	48	2,3	2	1	2	2	1	1	1	1	1	4	1	1
459	459-B	female	66		2014.7.10/2018.11.15	0	0	0	0	0	0	1	Baoshan in Shanghai	66	2	2	11	3					2		1	2	1	1	2	2	2	1	1	1	1	1	1
460	460-A	female	73	Lost to follow-up	2014.7.10/2018.11.15	0	0	0	0	0	0	1	Baoshan in Shanghai	35	4	2	11	3					2		1	2	1	2	2	6	1	1	1	1	4	2	1
461	461-A	female	78		2014.7.10/2018.11.15	0	0	0	0	0	0	1	Baoshan in Shanghai	78	1	2	11	3					2		1	1	1	2	2	1	1	1	1	1	1	1	1
461	461-B	male	83		2014.7.10/2018.11.15	0	0	0	0	0	0	1	Baoshan in Shanghai	83	3	2	11	3					2		1	2	1	1	2	1	2	1	1	1	4	1	1
462	462-A	male	80		2014.7.10/2018.11.15	0	0	0	0	0	0	1	Baoshan in Shanghai	80	2	2	11	3					2		1	1	1	2	2	1	1	1	1	1	1	1	1
462	462-B	female	78		2014.7.10/2018.11.15	0	0	0	0	0	0	1	Baoshan in Shanghai	78	2	2	11	3					2		1	1	1	2	2	1	1	1	1	1	1	1	1
463	463-A	male	63		2014.7.10/2018.11.15	2	2	4	4	10	10	1	Baoshan in Shanghai	63	3	2	11	1	40	23	7	10	2		2,3,4，	1	1	2\1	2\1	1	1	1	1	1	3	3	1
464	464-A	female	76		2014.7.10/2018.11.15	0	0	0	0	0	0	1	Baoshan in Shanghai	31	3	2	11	3					2		2	1	1	1	2	1	2	2	1	1	3	2	1
464	464-B	male	75		2014.7.10/2018.11.15	0	0	0	0	0	0	1	Baoshan in Shanghai	75	3	2	11	3					2		1	2	1	1	2	1	2	1	1	1	1	2	1
465	465-A	female	54		2014.7.10/2018.11.15	0	0	0	0	0	0	1	Baoshan in Shanghai	54	4	2	11	3					2		1	1	1	2	2	1	2	1	4	1	2	1	1
466	466-A	male	64		2014.7.10/2018.11.15	0	0	0	0	0	0	1	Baoshan in Shanghai	64	4	2	11	2					1	20	1,3	1	1	1	2	1	2	3	2	1	1	1	1
466	466-B	female	63		2014.7.10/2018.11.15	0	0	0	0	0	0	1	Baoshan in Shanghai	63	4	2	11	3					2		1	1	1	2	2	1	2	1	1	1	4	1	1
467	467-A	female	56	Lost to follow-up	2014.7.10/2018.11.15	0	0	0	0	0	0	1	Baoshan in Shanghai	56	4	2	11	3					2		1	1	1	2	2	1	2	1	1	1	3	2	1
468	468-A	female	58		2014.7.10/2018.11.15	0	0	0	0	0	0	1	Baoshan in Shanghai	58	5	2	11	3					2		2,3	2	1	2	2	1	1	1	1	1	3	1	1
469	469-A	female	65		2014.7.10/2018.11.15	0	0	0	0	0	0	1	Baoshan in Shanghai	65	2	2	11	3					2		1	1	1	2	2	1	1	1	1	1	4	1	1
470	470-A	female	78		2014.7.10/2018.11.15	7	7	5	5	4	4	1	Baoshan in Shanghai	78	2	2	11	3					2		2	2	1	1	2	1	2	1	1	1	4	1	1
471	471-A	female	57		2014.7.10/2018.11.15	0	0	0	0	0	0	1	Baoshan in Shanghai	57	3	2	11	3					2		1	1	1	2	2	1	2	1	1	1	4	1	1
472	472-A	male	58		2014.7.10/2018.11.15	0	0	0	0	0	0	1	Baoshan in Shanghai	58	3	2	11	2					1	40	2,3,4	3	1	1	2	1	2	1	1	1	3	1	1
473	473-A	male	77		2014.7.10/2018.11.15	0	0	0	0	0	0	1	Baoshan in Shanghai	77	5	2	11	1	47	30	7	6	2		1	1	1	2	2	1	1	1	1	1	1	3	1
474	474-A	female	54		2014.7.10/2018.11.15	0	0	0	0	0	0	1	Baoshan in Shanghai	54	1	1	12	3					2		1	3	1	2	2	1	1	1	1	3	1	4	1
475	475-A	male	75		2014.7.10/2018.11.15	0	0	0	0	0	0	1	Baoshan in Shanghai	75	5	2	11	3					2		2,5	3	1	2	2	2	1	3	3	1	4	2	1
475	475-B	female	74		2014.7.10/2018.11.15	0	0	0	0	0	0	1	Baoshan in Shanghai	74	5	2	11	3					2		1	2	1	1	2	2	2	3	1	1	3	2	1
476	476-A	male	62		2014.7.10/2018.11.15	0	0	0	0	0	0	1	Baoshan in Shanghai	62	4	2	11	2					3		1,3,4	1	1	2	2	1	5	1	1	1	4	1	1
477	477-A	female	65		2014.7.11/2018.11.15	0	0	0	0	0	0	1	Baoshan in Shanghai	65	3	2	11	3					2		1	1	1	1	1	1	2,5	1	1	1	4	3	1
478	478-A	female	70		2014.7.11/2018.11.15	0	0	0	0	0	0	1	Baoshan in Shanghai	70	3	2	11	3					2		1	1	1	1	2	2	2	1	1	1	4	1	1
479	479-A	male	67	Lost to follow-up	2014.7.11/2018.11.15	0	0	0	0	0	0	1	Baoshan in Shanghai	67	5	2	11	1	40	27	7	10	1	27	2,4	1	1	2	2	1	1	1	1	1	2	1	1
480	480-A	male	67		2014.7.11/2018.11.15	8	8	5	5	3	3	1	Baoshan in Shanghai	67	2	2	11	3					2		1	2	1	2	2	1	1	1	1	1	2	4	1
